# Supplementary material
Source: PubMed Central journal article supplement (PMC2684794)
Supplement: NIHMS78584-supplement-Supp_Info.pdf [file NIHMS78584-supplement-Supp_Info.pdf]

## Supplementary Note

### Evolutionary Toggling of the MAPT 17q21.31 Inversion Region

Michael C. Zody<sup>1,2\*</sup>, Zhaoshi Jiang<sup>3\*</sup>, Hon Chung Fung<sup>4,5</sup>, Francesca Antonacci<sup>3</sup>, LaDeana Hillier<sup>6</sup>, Maria Francesca Cardone<sup>7</sup>, Tina A. Graves<sup>6</sup>, Jeffrey M. Kidd<sup>3</sup>, Ze Cheng<sup>3</sup>, Amr Abouelleil<sup>1</sup>, Lin Chen<sup>3</sup>, John Wallis<sup>6</sup>, Jarret Glasscock<sup>6</sup>, Richard K. Wilson<sup>6</sup>, Amy Denise Reily<sup>6</sup>, Jaime Duckworth<sup>7</sup>, Mario Ventura<sup>8</sup>, John Hardy<sup>4†</sup>, Wesley Warren<sup>6†</sup>, Evan E. Eichler<sup>3†</sup>

#### 1.1) Human H2 haplotype sequence assembly

The sequence and orientation of the 17q21 region within the current genome assembly (build36) is consistent with the H1 haplotype, however, the underlying clones were derived from different donors. We outline below the steps taken in resolving/confirming the sequence of a single H1 haplotype, constructing a corresponding H2 minimal tiling path, and its ultimate sequencing to create an alternate haplotype for this region of the human genome. A critical aspect in this effort was the observation from Stefansson and colleagues<sup>1</sup> that the RPCI-11 BAC library was derived from a heterozygous donor. The availability of large-insert clones (~150 kbp) from a heterozygous donor was necessary to construct a complete tiling path across the region from both haplotypes (i.e. the high depth of the coverage of the RPCI-11 library and the large inserts allowed contiguity to be established in both haplotypes, despite the extensive duplication and copy-number variation associated within this region of the genome).

To completely encompass the region, we examined both the inverted region bounded by the large inverted segmental duplications (chr17:40,866,797 to 42,139,903 bp, identical coordinates on both NCBI build35 and 36) as well as 300 kb of sequence flanking either side of the inversion. We then sampled 1 kb of non-repeatmasked sequence approximately every 50 kb along this sequence and searched GenBank by BLAST, recovering a total of 62 finished and unfinished clones (not including non-human or non-genomic sequences). Within the inverted region, we identified 12 clones (11 finished and one draft) from RPCI-11 that contributed at least some unique sequence. In addition, we identified several clones from other libraries, most of which currently constitute the reference sequence.

Using a panel of 79 single nucleotide polymorphisms (SNPs) that differentiate the H1/H2 haplotype (HapMap)<sup>2</sup>, we assigned 10 of these RPCI-11 clones to either H1 or H2. The proximal breakpoint clone AC091132 was assigned to H1 based on overlap with other assigned clones. AC019319 lies outside the distal breakpoint and remains unassigned, but is inferred to come from the chromosome carrying the H2 haplotype based on partial

overlap sequence data. Using this same SNP panel, we also determined that all other sequenced GenBank clones from other libraries (RPCI-5, RPCI-13, Cal Tech B & D, Genome Systems, WIBR-1 [Fosmid] and an unidentified PAC library) were of H1 origin, although not necessarily identical to the RPCI-11 H1 variant. Consequently, we decided to replace the H1 path within the genome assembly (build36) along with generating an H2-specific tiling path. Note that due to the sparse sampling of these other libraries it is impossible to determine whether the other BAC libraries are derived from H1 homozygous or H1/H2 heterozygous donors.

From this data, we were initially able to construct four sequence contigs consisting of six finished clones in H1 and three sequence contigs consisting of four finished clones and one draft clone on H2. We then proceeded to fill gaps and extend to the unique sequence outside the breakpoints using a method we term “haplotype walking”. We aligned all existing BAC end sequences for RPCI-11 to all the sequenced clones in the region (in some cases including non-RPCI-11 clones where they overlapped portions of the H2 sequence that was not covered by RPCI-11 H1 clones). Due to the high sequence divergence between H1 and H2, for most BAC ends hitting both H1 and H2 (including within segmentally duplicated regions) we were able to find at least one position where the haplotypes or segmental duplications differed by at least 1 base and the end sequence matched one of the two haplotypes (mismatches due to BAC end sequencing error most frequently appeared as mismatches against both haplotypes). Because the segmental duplications of this region map to other regions on chromosome 17, some high quality BAC end sequences mapped to several other locations. In these cases, we examined all possible matches within the genome assembly as well as all sequenced BAC clones, selecting only those end-placements that had no better hit elsewhere in the genome. By this method, we were able to select clones of known haplotype that spanned gaps or extended sequence within either H1 or H2 haplotypes. Subsequent sequencing (100% identity of overlap of the complete clone sequences) confirmed haplotype contiguity for both H1 and H2.

The final paths for both H1 and H2 (Table 1) begin at 40,847,865 on NCBI build36 (coincidentally, both proximal clones share the same proximal restriction site). The H1 path consists of 11 non-redundant finished clones, contains no gaps and joins into AC019319 on the build36 path. The H2 path consists of 11 non-redundant finished clones and one gap currently spanned by several unfinished clones. It does not link out to AC019319, as end sequence probing of the RPCI-11 library has not revealed any clones that appear to span this region on the H2 haplotype. Sequence comparisons between H1 and H2, however, suggest that the distal breakpoint is captured. The remaining gap region contains a large inverted duplication unique to the H2 haplotype with >99.95% identity between the arms that has not yet been adequately resolved.

Table 1. Human H1 and H2 clone sequence assembly.

| Assembly | Start   | End     | Status | Clone ID    | Clone Start       | Clone End | Orientation |
|----------|---------|---------|--------|-------------|-------------------|-----------|-------------|
| H1       | 1       | 207611  | F      | AC091132.16 | 1                 | 207611    | -           |
| H1       | 207612  | 361933  | F      | AC126544.5  | 18619             | 172940    | +           |
| H1       | 361934  | 367166  | F      | AC217774.1  | 34243             | 39475     | -           |
| H1       | 367167  | 515232  | F      | AC217771.1  | 24510             | 172575    | -           |
| H1       | 515233  | 728971  | F      | CR936218.6  | 1                 | 213739    | -           |
| H1       | 728972  | 764751  | F      | AC217773.1  | 97752             | 133531    | -           |
| H1       | 764752  | 934781  | F      | AC005829.1  | 1                 | 170030    | -           |
| H1       | 934782  | 1094428 | F      | AC217777.1  | 21173             | 180819    | +           |
| H1       | 1094429 | 1294848 | F      | AC138645.3  | 1                 | 200420    | +           |
| H1       | 1294849 | 1446099 | F      | AC217780.1  | 1                 | 151251    | -           |
| H2       | 1       | 176270  | F      | AC217778.1  | 1                 | 176270    | -           |
| H2       | 176271  | 284196  | F      | AC217769.1  | 86955             | 194880    | +           |
| H2       | 284197  | 467289  | F      | AC138688.2  | 1                 | 183093    | -           |
| H2       | 467290  | 591112  | F      | AC127032.8  | 63863             | 187685    | +           |
| H2       | 591113  | 664772  | F      | AC217772.1  | 89488             | 163147    | +           |
| H2       | 664773  | 815539  | F      | AC217779.1  | 30096             | 180862    | +           |
| H2       | 815540  | 876284  | F      | BX544879.6  | 116408            | 177152    | +           |
| H2       | 876285  | 1027216 | F      | AC217770.1  | 1                 | 150932    | -           |
| H2       | 1027217 | 1042766 | F      | AC225613.2  | 154971            | 170520    | -           |
| H2       | 1042767 | 1197876 | F      | AC217768.1  | 1                 | 155110    | +           |
| H2       | 1197877 | 1198876 | N      | 1000        | clone no captured |           |             |
| H2       | 1198877 | 1378440 | F      | AC139677.4  | 1                 | 179564    | -           |
| H2       | 1378441 | 1481050 | F      | AC217775.1  | 74484             | 177093    | +           |

F=Finished clone; N=Gap. Gap size, gap type and capture state were indicated where there is a gap.

H1 haplotype

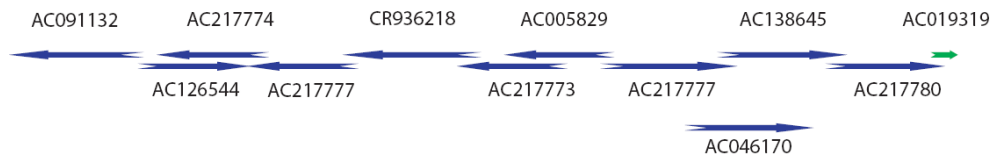

H2 haplotype

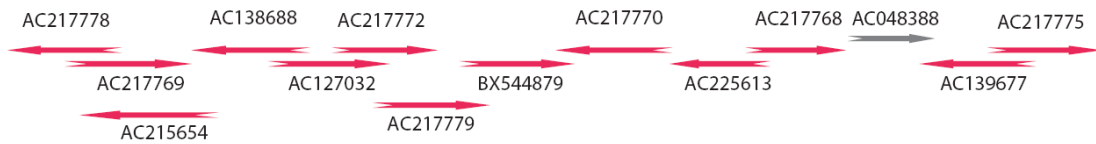

- Finished H1 clone (RPCI-11 only), arrow shows orientation
- Finished H2 clone (RPCI-11 only), arrow shows orientation
- Draft clone (RPCI-11 only), arrow shows orientation
- Finished clone, outside inversion (RPCI-11 only), arrow shows orientation

## **Figure 1: Human H1 and H2 RPCI-11 clone sequence assembly**

### **1.2) Comparison of finished paths to those from Stefansson et al.**

In comparing our final finished path to those from Stefansson et al., we note that our H1 path spans approximately the same distance (starting with the same proximal clone) and contains only 10 clones compared to the 17 on the Stefansson path. We incorporated three of the four finished clones on the previous path (798-G-7 [AC091132], 707-O-23 [AC126544], and 259-G-18 [AC005829]), with the fourth (219-F-9) rendered redundant by a new clone that was needed to close the adjacent sequence gap. We also incorporated two already finished BACs (669-E-14 [CR936218] and 995-C-19 [AC138645]) not on the Stefansson path, rendering the two clones they show in working draft status redundant (413-P-22 [AC036218] and 297-E-22 [AC138687]).

We then proceeded to close gaps using walking based on BAC end sequence overlaps, to guarantee both optimality of the tiling path and correct haplotype placement of clones. Of the 11 Stefansson clones on H1 with no sequence data, five had no existing BAC ends (329-D-18, 503-N-13, 258-H-10, 562-H-3, and 201-P-9), one had low quality ends (256-F-16), and five had highly repetitive ends that could not be placed uniquely (339-E-12, 244-K-17, 170-C-3, 141-H-9, and 133-E-17).

We used a similar process on H2, incorporating all four finished clones from the Stefansson path (300-H-14 [AC138688], 162-O-14 [AC127032], 769-P-22 [BX544879], and 1070-B-7 [AC139677]) and the working draft clone (374-N-3 [AC048388]; this is the final gap closer and remains unfinished as of this writing despite two new subclone libraries). Our final path contains 14 clones (with an additional redundant clone sequenced to confirm a join) compared to the 18 in the Stefansson path and is longer on the proximal end but shorter on the distal end. Of 13 clones with no sequence data in the Stefansson H2 path, one (57-A-24) was identified by end sequence and used, a second (207-I-10) was sequenced and assembled as a backup for the gap region but proved redundant, three had no end sequences (401-F-5, 549-H-12, and 573-G-23), one had only one end sequence (84-A-7), one was redundant to two finished clones (even on the Stefansson map, 559-K-6), four were repetitive (94-M-7, 450-G-10, 450-L-21, and 396-D-2), one was discarded for a more efficient spanner (100-C-5), and one (360-B-17) actually appears from end sequence to belong to H1, although this is based on only a single end. In the end, the construction of the H2 haplotype proved much more difficult and required more redundant sequencing; unlike H1, the distal and proximal repeat copies of H2 are so similar as to often be indistinguishable from a 500-800 bp of end read sequence.”

### 1.3) Chimpanzee sequence and assembly of the MAPT region

Due to the less extensive duplication architecture in non-human primates, the development of a clone tiling path for chimpanzee was less complicated. We initially constructed a region-specific chimp assembly using a combination of the whole genome BAC fingerprint map and revised sequence assembly of the chimp genome (both located at our chimpanzee genome web page: <http://www.genome.wustl.edu>). Independent from fingerprints, the same order was confirmed from the mapping of end sequences of each clone to the human reference assembly, with the exception of the flanking duplications where discordant BAC end sequences suggested the presence of an inversion.

Our objective was to determine if the MAPT locus in the chimp could establish the most likely orientation of the H1/H2 haplotype in the last common ancestor of chimps and humans. Using BAC clone order from the chimp fingerprint map and BAC end sequence discordant pair analyses we were able to localize the putative points of inversion. Unfortunately, alignment of this chimp assembly sequence to the human genomic sequence (build36) did not allow for the unambiguous inversion orientation of the chimp genome assembly in this region. To confidently verify inversion orientation we selected and sequenced several candidate chimp BAC clones, using the 6X draft sequence assembly and fingerprint map coordinates that potentially span the predicted inversion and its breakpoints. At the inversion breakpoints, we required that there be 100% overlap between overlapping clones in order to ensure a single haplotype at each breakpoint. We sequenced the haplotypes corresponding to the inverted orientation—it was subsequently determined by FISH that chimpanzee Clint was heterozygous for the inversion.

We constructed a minimum tiling path across approximately 1.8 Mb from 15 BAC clones. The clone assembly order is outlined according to clone accession numbers (Figure 2). In addition to this BAC-based assembly, we established a primer pair set corresponding to known human H1/H2 SNPs. A subset of these chimp SNPs are characterized in Hardy et al. <sup>3</sup>. Despite our attempts to use these SNPs to differentiate chimp H1 and H2 clones, the high degree of sequence similarity in the duplicated regions and the coverage of the chimpanzee BAC library limited our ability to derive two distinct haplotype tiling-paths across the region.

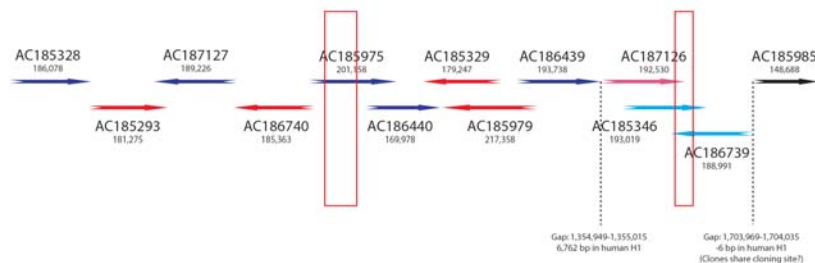

**Figure 2: Chimpanzee MAPT locus clone assembly.** Colors indicate clone chromosome of origin. In the first contig, clones alternate blue and red. In the second, light red and light blue. The third contig contains a single black clone. As yet, there is no ability to link the chromosomes of origin across the single gap (dotted line). The orientation is distal to proximal based on the alignment outside the inversion. The red boxes represent the posited location of the inversion breakpoints. Over these specific regions single haplotype continuity was maintained.

Table 2 Chimpanzee MAPT region clone assembly.

| Assembly | Start   | End     | Status | Accession | Clone Start | Clone End | Orientation |
|----------|---------|---------|--------|-----------|-------------|-----------|-------------|
| PTR_MAPT | 1       | 186078  | F      | AC185328  | 1           | 186078    | +           |
| PTR_MAPT | 186079  | 361176  | F      | AC185293  | 6178        | 181275    | +           |
| PTR_MAPT | 361177  | 519738  | F      | AC187127  | 1           | 158562    | -           |
| PTR_MAPT | 519739  | 698518  | F      | AC186740  | 1           | 178780    | -           |
| PTR_MAPT | 698519  | 887061  | F      | AC185975  | 12616       | 201158    | +           |
| PTR_MAPT | 887062  | 986262  | F      | AC186440  | 70778       | 169978    | +           |
| PTR_MAPT | 986263  | 1126775 | F      | AC185329  | 1           | 140513    | -           |
| PTR_MAPT | 1126776 | 208850  | F      | AC185979  | 1           | 82075     | -           |
| PTR_MAPT | 1208851 | 1354948 | F      | AC186439  | 47641       | 193738    | +           |
| PTR_MAPT | 1354949 | 1361710 | N      | 6762      | clone       | yes       |             |
| PTR_MAPT | 1361711 | 1554240 | F      | AC187126  | 1           | 192530    | +           |
| PTR_MAPT | 1554241 | 1604891 | F      | AC185346  | 142369      | 193019    | +           |
| PTR_MAPT | 1604892 | 1710663 | F      | AC186739  | 1           | 105772    | -           |
| PTR_MAPT | 1710664 | 1859345 | F      | AC185985  | 7           | 148688    | +           |

F=Finished clone; N=Gap. Gap Size, gap type, and caputre state were indicated where there is a gap.

#### 1.4) Orangutan sequence and assembly of the MAPT region

We developed two consensus sequences for the corresponding region in orangutan: one from whole genome shotgun sequence data and another from BAC clones sequenced to span the region. PCAP<sup>4</sup> software was used to assemble *Pongo pygmaeus abelii* whole genome shotgun data (donor=Susie, a female sumatran orangutan housed at the Gladys Porter Zoo, Brownsville, TX). FISH analysis showed that a cell line derived "Susie" was homozygous for the inversion. To determine chromosomal order and organization, the WGS assembly data were compared to the human genome utilizing BLASTZ<sup>5</sup> and Miropeats<sup>6</sup> and only "reciprocal best" alignments were retained. The ordered and oriented list of overlapping clones that form a minimal tiling path through the region (AGP) were generated from these alignments as described previously<sup>7</sup>. The primary inversion in the orangutan genome with respect to the human genome reference (H1) assembly is predicted and contained within a single PCAP supercontig (Supercontig339).

For the clone-based assembly, orangutan BAC clones were selected for sequencing and initial estimates of clone order were obtained based on BAC end sequence alignment to the corresponding region of the human genome (build36). After sequencing, the BAC

clone sequences were each aligned against all others requiring topological consistency to determine order, orientation and overlap in the orangutan genome (Fig. 3). The minimum tiling path across the 2.0 Mb of orangutan sequence consists of 14 clones (Table 3). A comparison between the clone-based assembly and sequence-based assembly found few differences (Fig. 3).

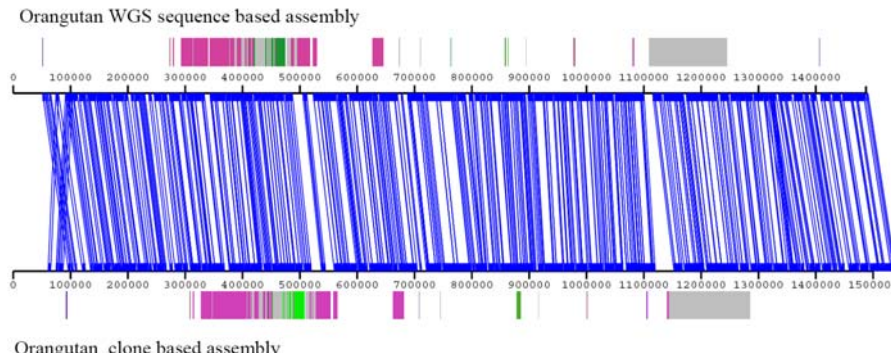

**Figure 3: Comparison between sequence based assembly and clone based assembly of the MAPT region in orangutan.** Parallel blue joining-lines show consistency in sequence structure and orientation (Miropeats  $\rightarrow$  2000). The largest discrepancy was an 18 kbp segment that was missing from the WGS assembly (located between 1.1 and 1.2Mbp of clone assembly). Regions that correspond to human duplicons were annotated as color-coded boxes; however, the majority of this sequence is not duplicated within the orangutan based on WSSD analysis.

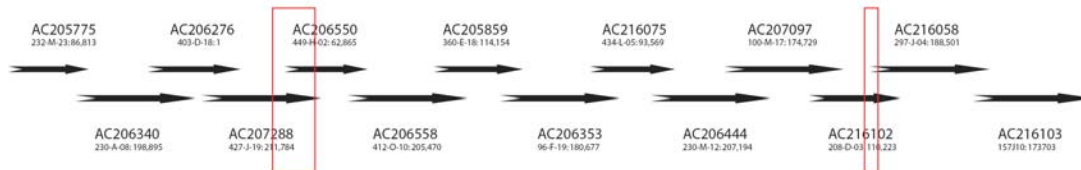

**Figure 4: Orangutan MAPT locus clone assembly.** A minimum tiling path of BACs selected across 2 Mb of the orangutan sequence assembly in correspondence with the human MAPT locus (chr17:40.46-42.85Mb). The red boxes contain the inversion breakpoints as determined by alignment with human. Sequence overlaps between clones (AC206558/AC205859 and AC207097/AC216102/AC216058) are >99.9% identical.

Table 3 Orangutan MAPT region clone assembly.

| Assembly | Start   | End     | Status | Clone    | Clone Start | Clone End | Orientation |
|----------|---------|---------|--------|----------|-------------|-----------|-------------|
| PPY_MAPT | 1       | 86813   | F      | AC205775 | 1           | 86813     | -           |
| PPY_MAPT | 86814   | 285708  | F      | AC206340 | 1           | 198895    | +           |
| PPY_MAPT | 285709  | 285709  | D      | AC206276 | 51188       | 51188     | +           |
| PPY_MAPT | 285710  | 497493  | F      | AC207288 | 1           | 211784    | -           |
| PPY_MAPT | 497494  | 560358  | D      | AC206550 | 68688       | 131552    | +           |
| PPY_MAPT | 560359  | 765828  | F      | AC206558 | 1           | 205470    | +           |
| PPY_MAPT | 765829  | 879982  | F      | AC205859 | 1           | 114154    | -           |
| PPY_MAPT | 879983  | 1060659 | F      | AC206353 | 20275       | 200951    | +           |
| PPY_MAPT | 1060660 | 1154228 | D      | AC216075 | 83428       | 176996    | -           |
| PPY_MAPT | 1154229 | 1361422 | F      | AC206444 | 1           | 207194    | -           |
| PPY_MAPT | 1361423 | 1536151 | D      | AC207097 | 1           | 174729    | -           |
| PPY_MAPT | 1536152 | 1646374 | D      | AC216102 | 30062       | 140284    | -           |
| PPY_MAPT | 1646375 | 1834875 | D      | AC216058 | 1           | 188501    | +           |
| PPY_MAPT | 1834876 | 2008578 | D      | AC216103 | 1           | 173703    | -           |

F=Finished clone. D=high quality draft clones.

#### 1.4) Non-human primate segmental duplication analysis

We analyzed duplication content using the WSSD method<sup>8,9</sup> for both the chimpanzee (Figure 5 a) and orangutan (Figure 5 b) 17q21.31 MAPT region. Regions of excess sequence read coverage (per 5kb window) are flagged in red and concatenated (light blue WSSD intervals) to identify recent duplications in each species. For comparison, human segmental duplications<sup>10</sup> are annotated (colored blocks) on the chimpanzee and orangutan sequences—although these are not necessarily duplicated within the non-human primate species. A comparison of the predicted duplications and detected duplication suggest that most of the duplication has occurred subsequent to the separation of the human/Great ape lineage from the Asian ape lineage (<12 mya).



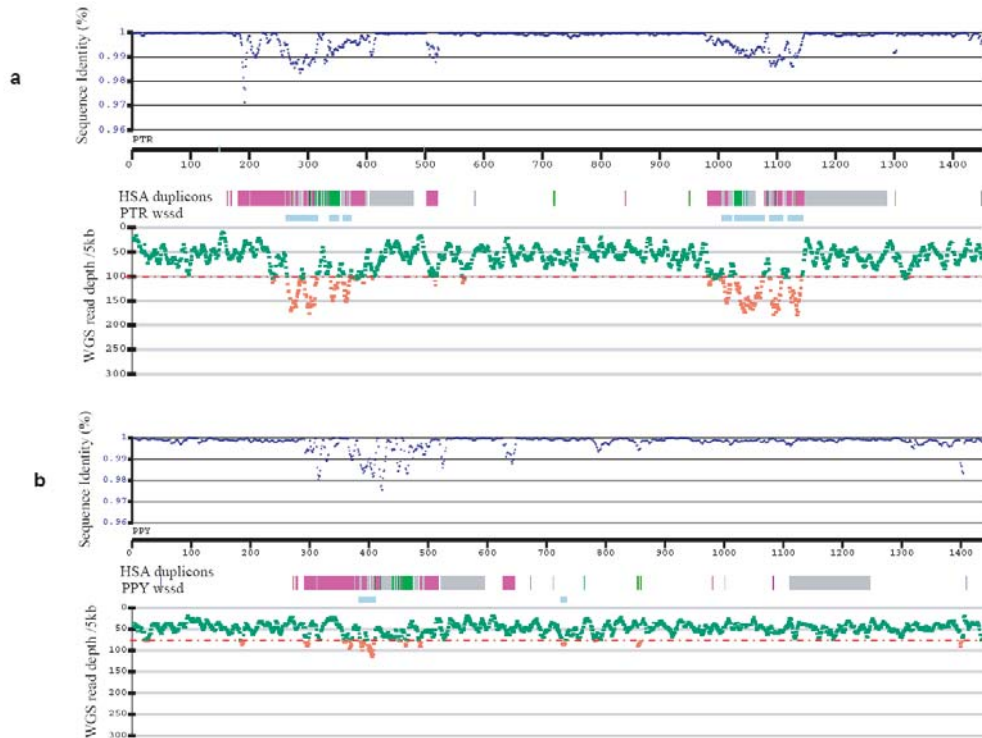

**Figure 5: Non-human primate segmental duplication analysis.**

## 2) Human haplotype analysis

Using the diagnostic SNP markers (rs1800547, rs9468), we partitioned the CEU HapMap haplotypes (Phase II HapMap release 21 phased-consensus available at <http://hapmap.org>) into 96 H1-chromosomes and 24 H2-chromosomes (after correcting for genotyping phasing errors, see below). We treated H1 and H2 haplotypes as separate populations in the analysis and limited our consideration to 611 SNP positions which could be uniquely mapped to non-duplicated portions of the sequenced H1 and H2 haplotypes. We identified 381 SNPs whose alleles are fixed differences between the H1 and H2 haplotypes. In addition, we identified a total of 207 SNPs that were fixed in one haplotype but polymorphic in the other. We assessed the likely ancestral state of each SNP through a comparison with the sequenced chimpanzee haplotype. For SNPs that are monomorphic among H2 haplotypes but polymorphic among the H1s, we found that the allele found in the H2 haplotypes matched the chimpanzee allele 90% of the time (150/166 considered positions). For SNPs that are monomorphic among H1 haplotypes but polymorphic among the H2s, the allele found in the H1 haplotypes matched the chimpanzee 60% of the time (17/28 considered positions). This suggests that the ancestral haplotype was H2-like.

This analysis of SNP ancestral state is based on a comparison against a single chimpanzee chromosome (the sequenced Clint haplotype). In order to assess possible biases introduced by this approach, we selected 10 SNPs that are polymorphic among CEU H1 chromosomes but are fixed among all CEU H2 chromosomes. Based on sequencing of PCR products, we genotyped seven chimpanzees (Clint plus six additional chimps, corresponding to a total of 14 chromosomes) at these SNP positions. The examined chimpanzees had a mixture of H1 and H2 orientations, but all of the chimpanzees are homozygous for the allele found among the H2 chromosomes.

Table 4. Assessing SNP ancestral state in multiple chimpanzees

| SNP ID     | H1 Alleles | H2 Allele | 17q21 Orientation |      |       |       |       |       |       |     |
|------------|------------|-----------|-------------------|------|-------|-------|-------|-------|-------|-----|
|            |            |           | H1/H1             |      | H1/H2 |       |       | H2/H2 |       |     |
|            |            |           | Logan             | PTR4 | Clint | PTR13 | Katie | PTR8  | PTR12 |     |
| rs417968   | A/G        | G         | G/G               | G/G  | G/G   | G/G   | G/G   | G/G   | G/G   | G/G |
| rs1724409  | G/T        | G         | G/G               | G/G  | G/G   | G/G   | G/G   | G/G   | G/G   | G/G |
| rs1635291  | A/G        | G         | G/G               | G/G  | G/G   | G/G   | G/G   | G/G   | G/G   | G/G |
| rs1635289  | A/G        | G         | G/G               | G/G  | G/G   | G/G   | G/G   | G/G   | G/G   | G/G |
| rs10451282 | C/T        | C         | C/C               | C/C  | C/C   | C/C   | C/C   | C/C   | C/C   | C/C |
| rs1880756  | C/T        | C         | C/C               | C/C  | C/C   | C/C   | C/C   | C/C   | C/C   | C/C |
| rs110402   | A/G        | G         | G/G               | G/G  | G/G   | G/G   | G/G   | G/G   | G/G   | G/G |
| rs242939   | C/T        | T         | T/T               | T/T  | T/T   | T/T   | T/T   | T/T   | T/T   | T/T |
| rs242943   | C/T        | C         | C/C               | C/C  | C/C   | C/C   | C/C   | C/C   | C/C   | C/C |
| rs1158660  | A/G        | G         | G/G               | G/G  | G/G   | G/G   | G/G   | G/G   | G/G   | G/G |

We genotyped 10 SNPs which are polymorphic among CEU H1 chromosomes but are fixed among H2 chromosomes in 7 chimpanzees. As indicated, the sampled chimpanzees contained both H1 and H2 orientations (see Figure 2)

While most SNPs represented fixed differences between H1 and H2, we did identify 23 SNPs that are polymorphic in both H1 and H2; in addition, we find 16 SNPs where H2 is fixed derived allele when compared to chimpanzee. For these, we reanalyzed the SNPs considering both CpG status, frequency and the quality of the underlying data as possible sources for the discrepancy. Of the 16 SNPs that are polymorphic among H1s but do not have an H2 allele matching PTR, 9/16 (56%) are at potential CpG sites, corresponding to likely recurrent mutation events. Four of the remaining seven positions are found on two or fewer H1 chromosomes and may be expected to have a higher genotype miscall rate because of their low frequency. Such variants may be positions where a derived allele became fixed before the split of the H1/H2 lineages, and subsequently the same position mutated again among the H1 chromosomes. Three of the remaining positions are found at a 5% frequency or greater among the H1 chromosomes and are without a clear explanation. Of the 23 SNPs polymorphic in both lineages, 12/23 (52%) are at potential CpGs. Of the remaining 11 positions, five are polymorphic because of a single H1 or H2 chromosome. The most “problematic” positions are four sites that are not CpG and have a minor allele frequency >10% among both H1s and H2s. Based on their frequency it is unlikely that these represent low-quality SNP genotypes. Rather, this minority of SNPs may represent gene flow between the H1 and H2 regions perhaps by gene conversion processes within the inversion loop.

Note: Initial analysis of the HapMap SNPs (internal to the inversion chr17:40974015-41926692 and excluding SNPs that could not be mapped to the H1 or H2 sequences or that mapped into duplicated sequences) indicated that 15% (95/611) of the SNPs were polymorphic among both the H1 and H2 haplotypes. Such a pattern would suggest a substantial degree of gene flow among H1 and H2 haplotypes, an unlikely result given the impact of the inversion on recombination between H1 and H2. In order to investigate this pattern more carefully, we visualized the distribution of the 611 SNPs across this interval that could be uniquely mapped onto the sequenced H1 and H2 haplotypes. Figure 6 summarizes the alleles present at each of these positions in the H1 and H2 sequences as well as the 24 H2 haplotypes inferred from the HapMap data. We observed clear stretches of H1-like haplotypes (compare yellow squares in Fig. 5) on an otherwise H2-background—accounting for the majority (72/95) of the SNPs that were polymorphic in both haplotypes.

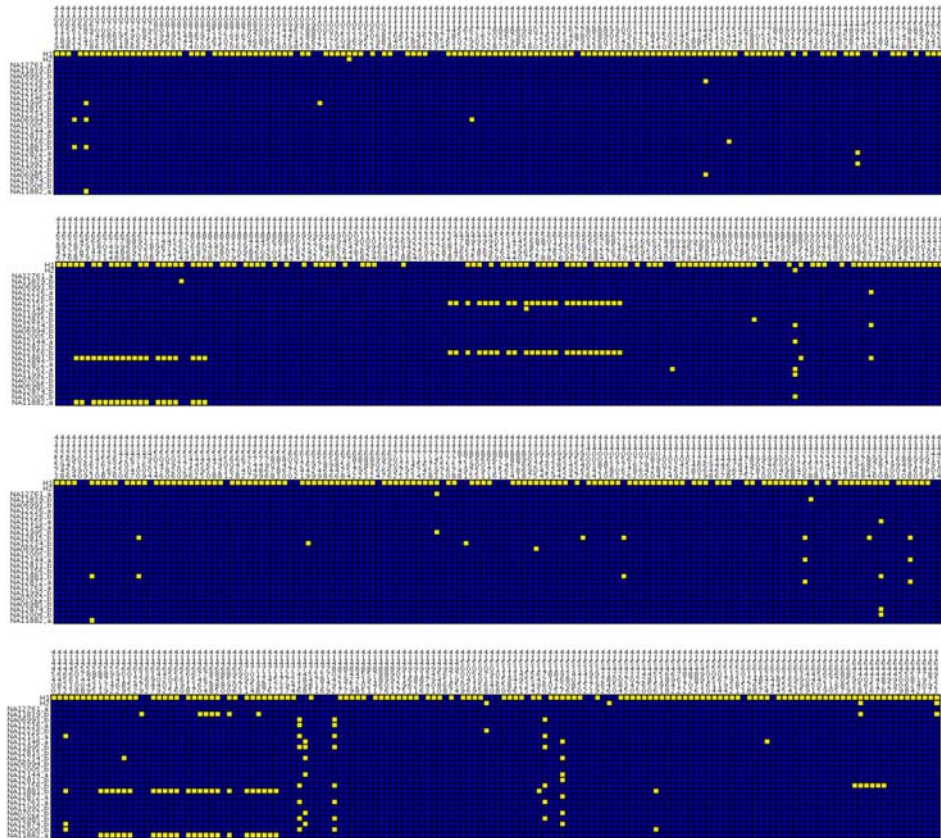

**Figure 6: Observed H2 haplotypes.** The alleles present at 611 HapMap SNPs are depicted for the sequenced H1 and H2 haplotypes and for all 24 inferred CEU H2 chromosomes within the HapMap sample set.

These stretches are derived from four H2 haplotypes inferred from four individuals. An examination of the other haplotype present in these four individuals (Fig. 6) indicates the presence of alternative alleles over these intervals that match the H2 haplotype. Blue square: major allele among 26 chromosomes depicted, yellow square: minor allele.

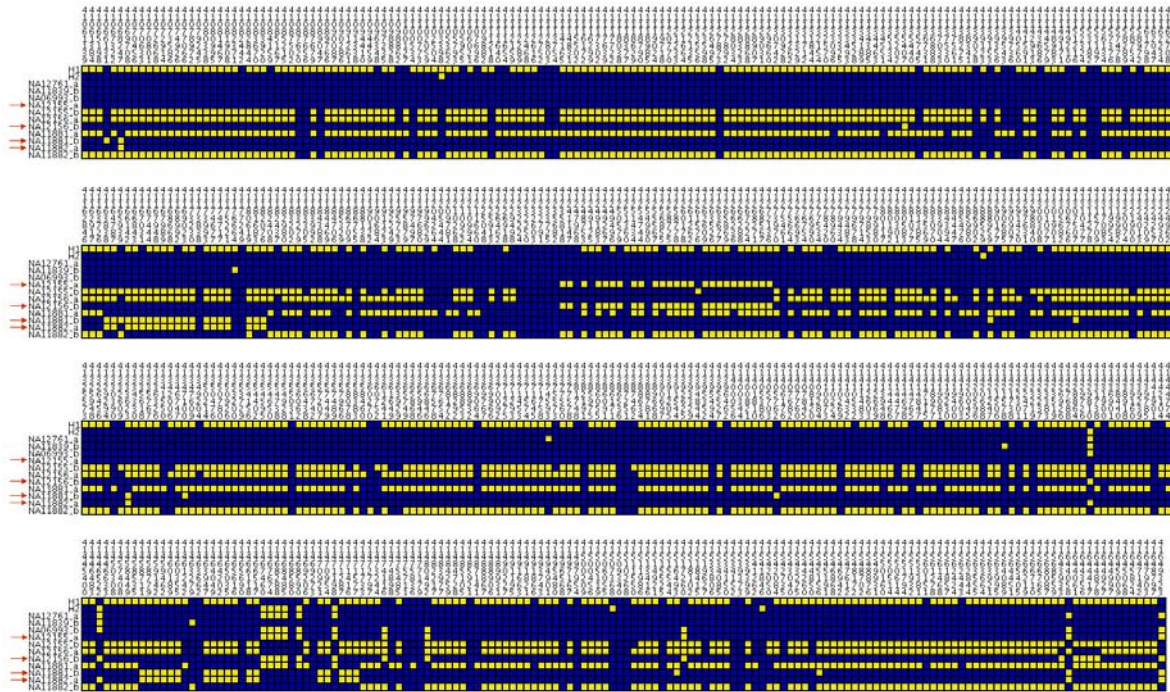

**Figure 7: Identification of phasing errors.** The four inferred H2 haplotypes containing unusual stretches of H1-like genotypes are depicted (NA11882\_a, NA11881\_b, NA12156\_b, NA12155\_a, highlighted by red arrows) along with the other haplotype from the same samples. The H1 and H2 sequenced haplotypes as well as three inferred H2 haplotypes are included for reference (top rows).

The four haplotypes represent two transmitted and two untransmitted chromosomes derived from the four parents of two CEU trios. Figure 8 indicates that for each of the four samples the two independent haplotypes show reciprocal phasing patterns (i.e. reciprocal H1-H2 hybrid haplotypes). Therefore, we conclude that the observed pattern is an artifact caused by phasing errors in the HapMap data. To fix the phase errors, we switched the haplotypes for four samples in the following intervals:

NA11881: 41163838-41182076; 41458711-41471577  
 NA11882: 41163838-41182076; 41458711-41471577  
 NA12155: 41235818-41272136  
 NA12156: 41235818-41272136; 41643933-41644878

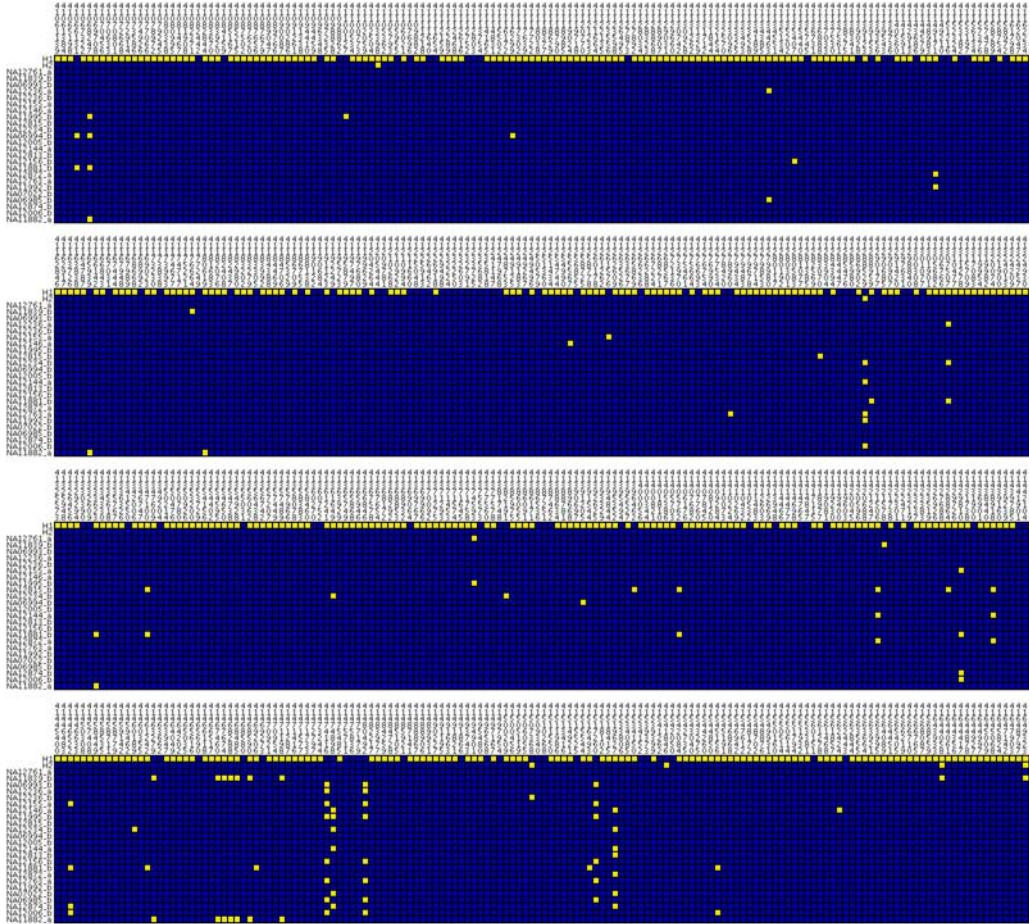

**Figure 8: Sequence variation among H2 haplotypes.** Variation among H2 haplotypes (depicted as in Fig. 5), following the correction of likely haplotype phasing errors.

### 3) Haplotype analysis by FISH and paired-end mapping

We developed a FISH assay to distinguish the orientation of the 17q21.31 region on metaphase chromosomes (Figure 9). Human genomic fosmid probes A and B map >1.5 Mb apart in the non-inverted state and appear as 2 distinct signals (red and green) on chromosomal metaphase spreads. In contrast, in the inverted state probes A and B map ~1 Mb apart and appear as a merged (red +green =yellow) signal. A reciprocal assay on the same samples using probes A and D (non-inverted=red + green; inverted=yellow) confirm the specificity of the assay. An analysis of 25 HapMap cell lines using this assay showed 100% correspondence between the H1/H2 haplotype and the non-inverted/inverted status (data not shown).

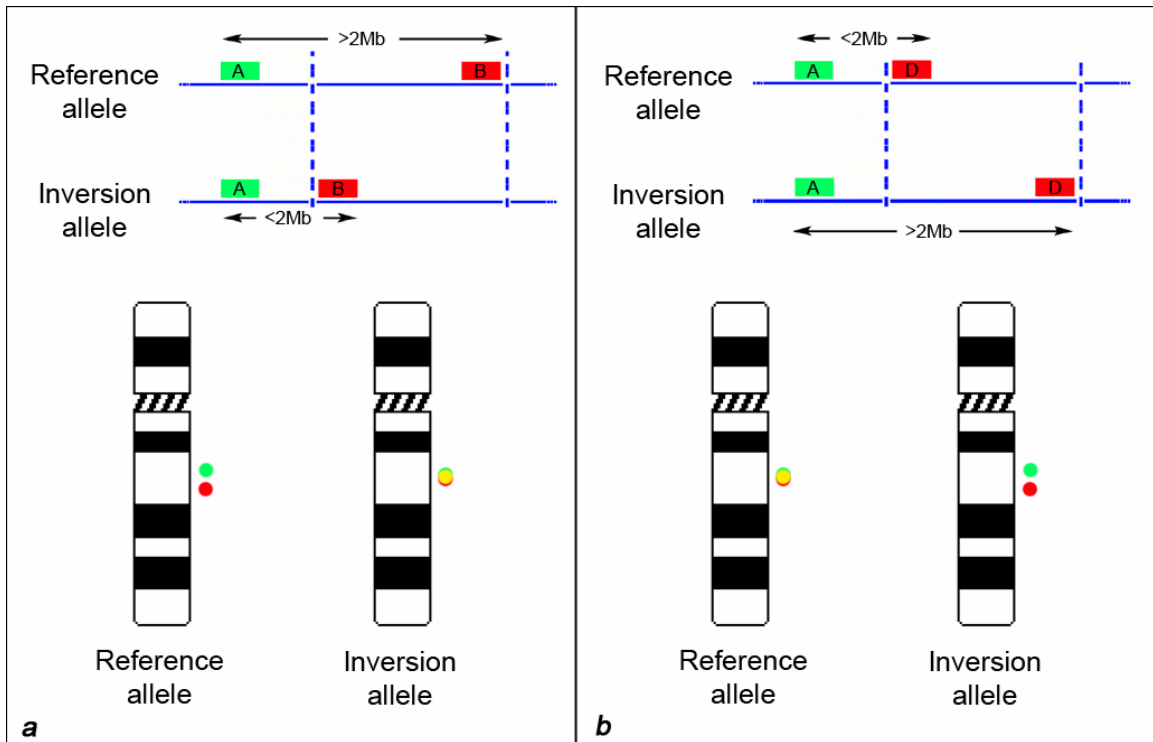

**Figure 9: Chr17q21.31 reciprocal inversion FISH assay.**

We applied this reciprocal FISH assay to other non-human primate metaphases, such as PPA (*Pan paniscus*); MMU (*Macaca mulatta*); MAR (*Macaca arctoides*); MFA (*Macaca fascicularis*). We found PPA2 is heterozygous for the inversion while PPA1 and all other non-human primates are homozygous for the inversion (Figure 10).

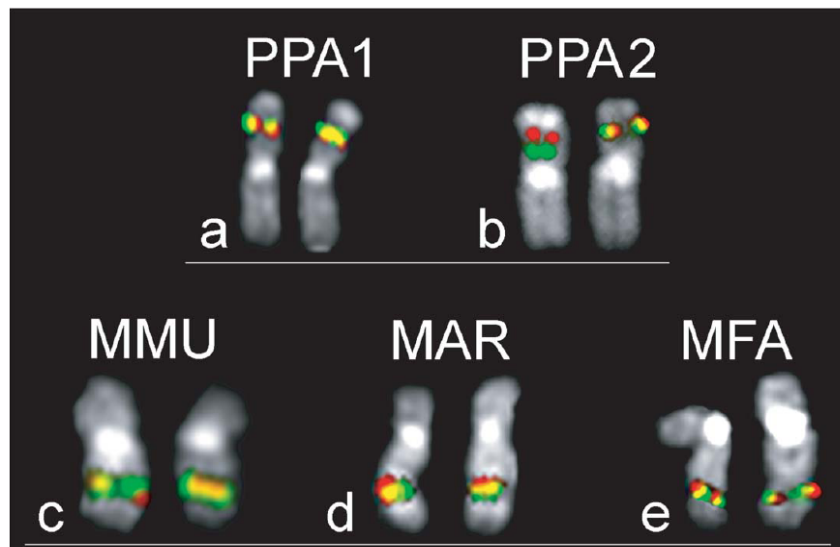

**Figure 10: Primate FISH analysis of 17q21.31 inversion.**

We then assessed haplotype diversity within the chimpanzee Clint (heterozygous for the inversion by FISH mapping) by mapping fosmid end-sequence pairs (ESPs) to unique portion of the BAC-based chimpanzee assembly. A total of 171 fosmid ESPs (top panel) showed perfect sequence identity to the unique region of the assembly (after quality rescoring, Phred  $Q \geq 30$ ) and 53 ESPs (bottom panel) showed at least one high quality single basepair discrepancy and were assigned the alternate haplotype (at that position). We considered all ESPs with sequence identity  $\geq 95\%$  and only clones which mapped to a “best” location<sup>11</sup>. Based on the aligned sequence, we computed the sequence divergence between the two haplotypes as 0.297% (144 difference /48408 aligned basepairs) or 99.70% sequence identity. The distribution of sequence-identical and sequence different clones based on ESP placement is shown (Figure 11)

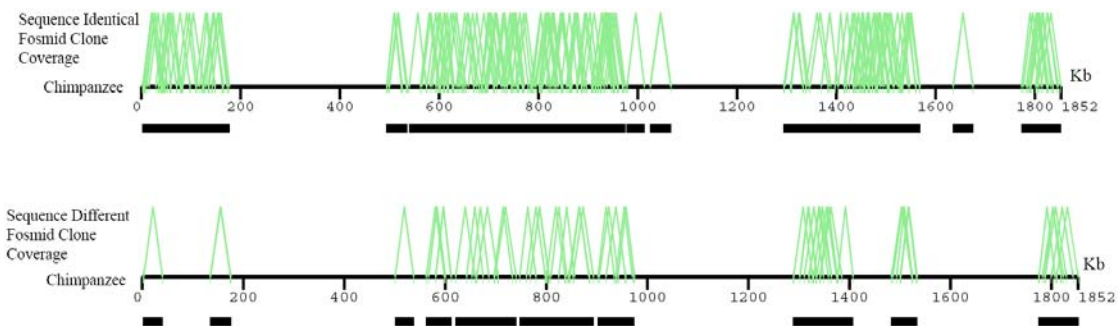

**Figure 11: Chimpanzee haplotype analysis.**

## REFERENCES

1. Stefansson, H. et al. A common inversion under selection in Europeans. *Nat Genet* **37**, 129-37 (2005).
2. McCarroll, S.A. et al. Common deletion polymorphisms in the human genome. *Nat Genet* **38**, 86-92 (2006).
3. Hardy, J. et al. Evidence suggesting that Homo neanderthalensis contributed the H2 MAPT haplotype to Homo sapiens. *Biochem Soc Trans* **33**, 582-5 (2005).
4. Huang, X., Wang, J., Aluru, S., Yang, S.P. & Hillier, L. PCAP: a whole-genome assembly program. *Genome Res* **13**, 2164-70 (2003).
5. Schwartz, S. et al. Human-mouse alignments with BLASTZ. *Genome Res* **13**, 103-7 (2003).
6. Parsons, J.D. Miropcats: graphical DNA sequence comparisons. *Comput. Applic. Biosci* **11**, 615-619 (1995).
7. CSAC. Initial sequence of the chimpanzee genome and comparison with the human genome. *Nature* **437**, 69-87 (2005).
8. Bailey, J.A. et al. Recent segmental duplications in the human genome. *Science* **297**, 1003-7 (2002).

9. Cheng, Z. et al. A genome-wide comparison of recent chimpanzee and human segmental duplications. *Nature* **437**, 88-93 (2005).
10. Jiang, Z. et al. Ancestral reconstruction of segmental duplications reveals punctuated cores of human genome evolution. *Nat Genet* **39**, 1361-8 (2007).
11. Tuzun, E. et al. Fine-scale structural variation of the human genome. *Nat Genet* **37**, 727-32 (2005).



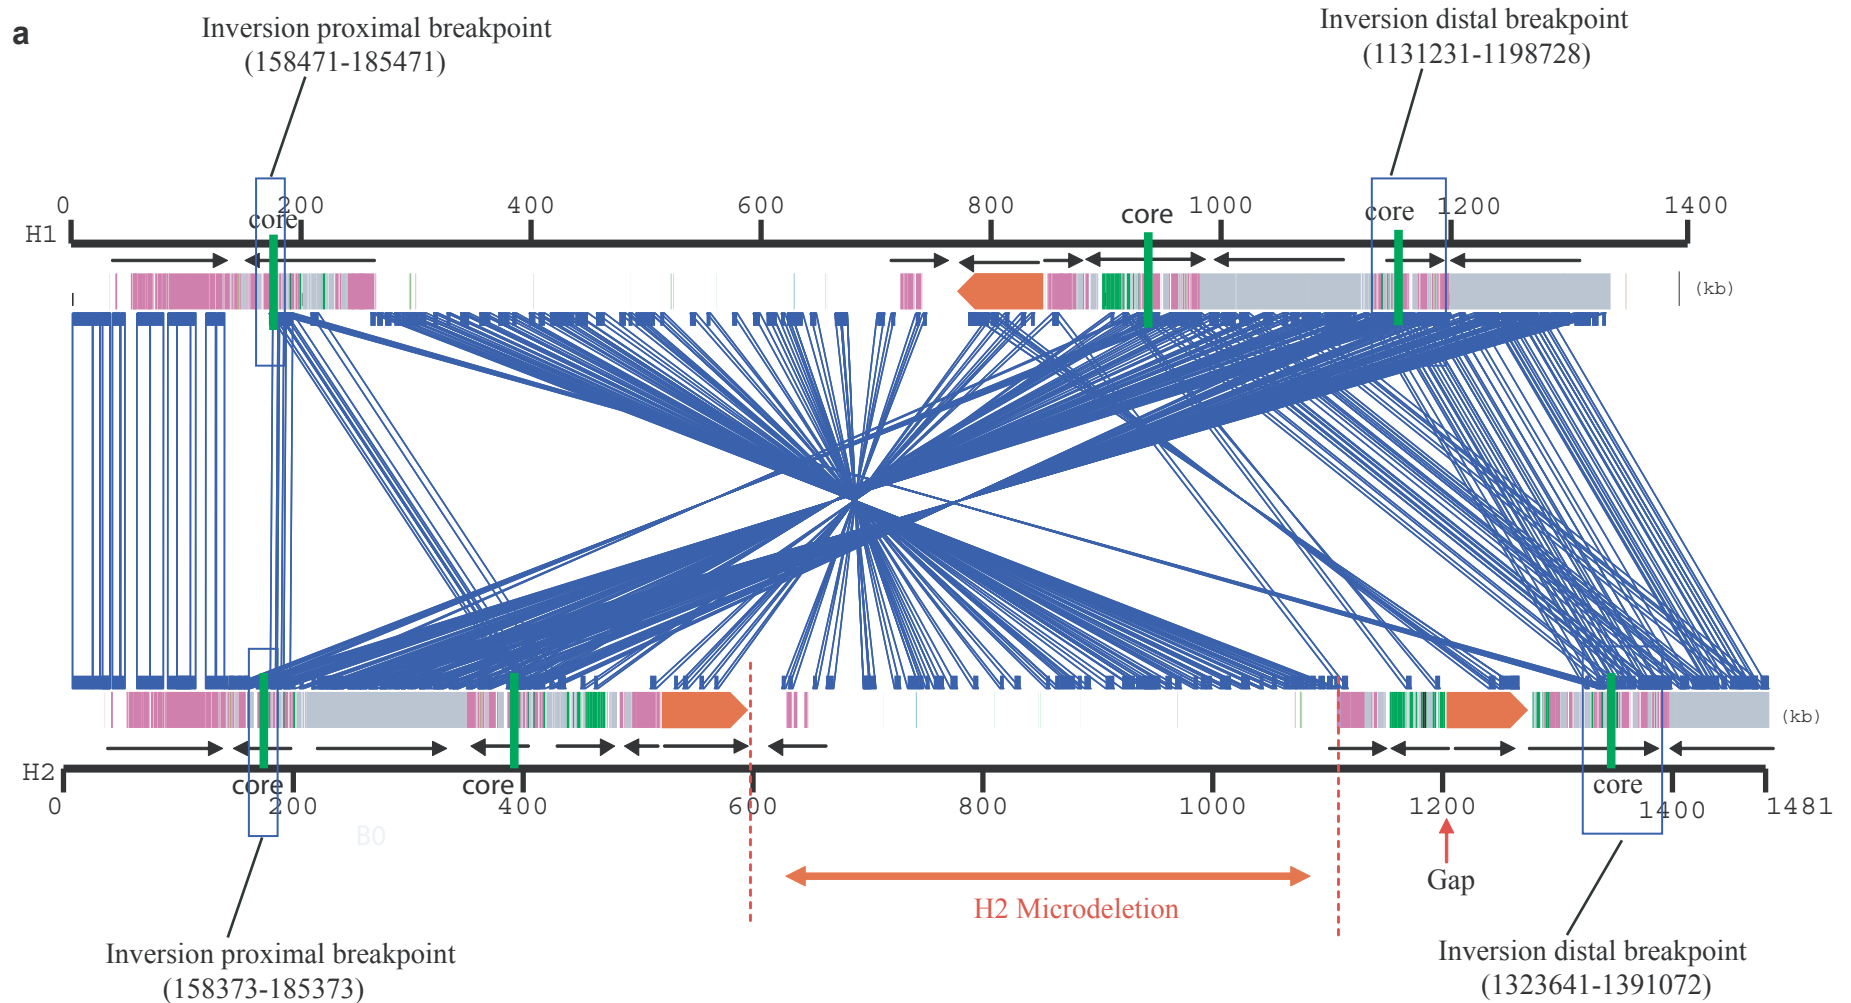

**Supplementary Figure 1: Pairwise sequence comparison of chr17q21.31 region among primates.**

Sequences (~1.5 Mbp) from human H1, human H2, chimpanzee and orangutan orthologous regions were compared using miropeats (Parsons, 1999) and two-way\_mirror.pl (Bailey et al., unpublished). Human duplication structures (colored blocks) were annotated according to a database of curated duplicons (Jiang et al., 2007).

(a) Human H1 vs. H2 sequence comparison revealed that the core segmental duplications (green bars) mapped within the inversion breakpoints (blue box) between H1 and H2 haplotypes. In order to define the inversion breakpoints, we repeatmasked both H1 and H2 haplotype assemblies and compared the sequences using default settings ( $s = 30$ ). We examined each of the four breakpoints in turn by examining the furthest extent of directly oriented sequence between the two haplotypes and the furthest extent of inverted oriented sequence. For each comparison, we required that the majority of consecutive seed alignments be collinear. We defined the breakpoint intervals based on this intersection for each breakpoint. Once intervals had been identified, we further refined the breakpoint by constructing 4 pairwise alignments based on the intervals and requiring at least 99.5% sequence identity. The intervals, thus defined, are indicated by blue boxes. The inversion places larger blocks of sequence homology flanking the 17q21.31 microdeletion region, including H2-specific segmental duplications (red block arrows) in direct orientation (which are single copy in H1). High-density array CGH maps one of the microdeletion breakpoints (red broken lines) to the H2-specific segmental duplication.

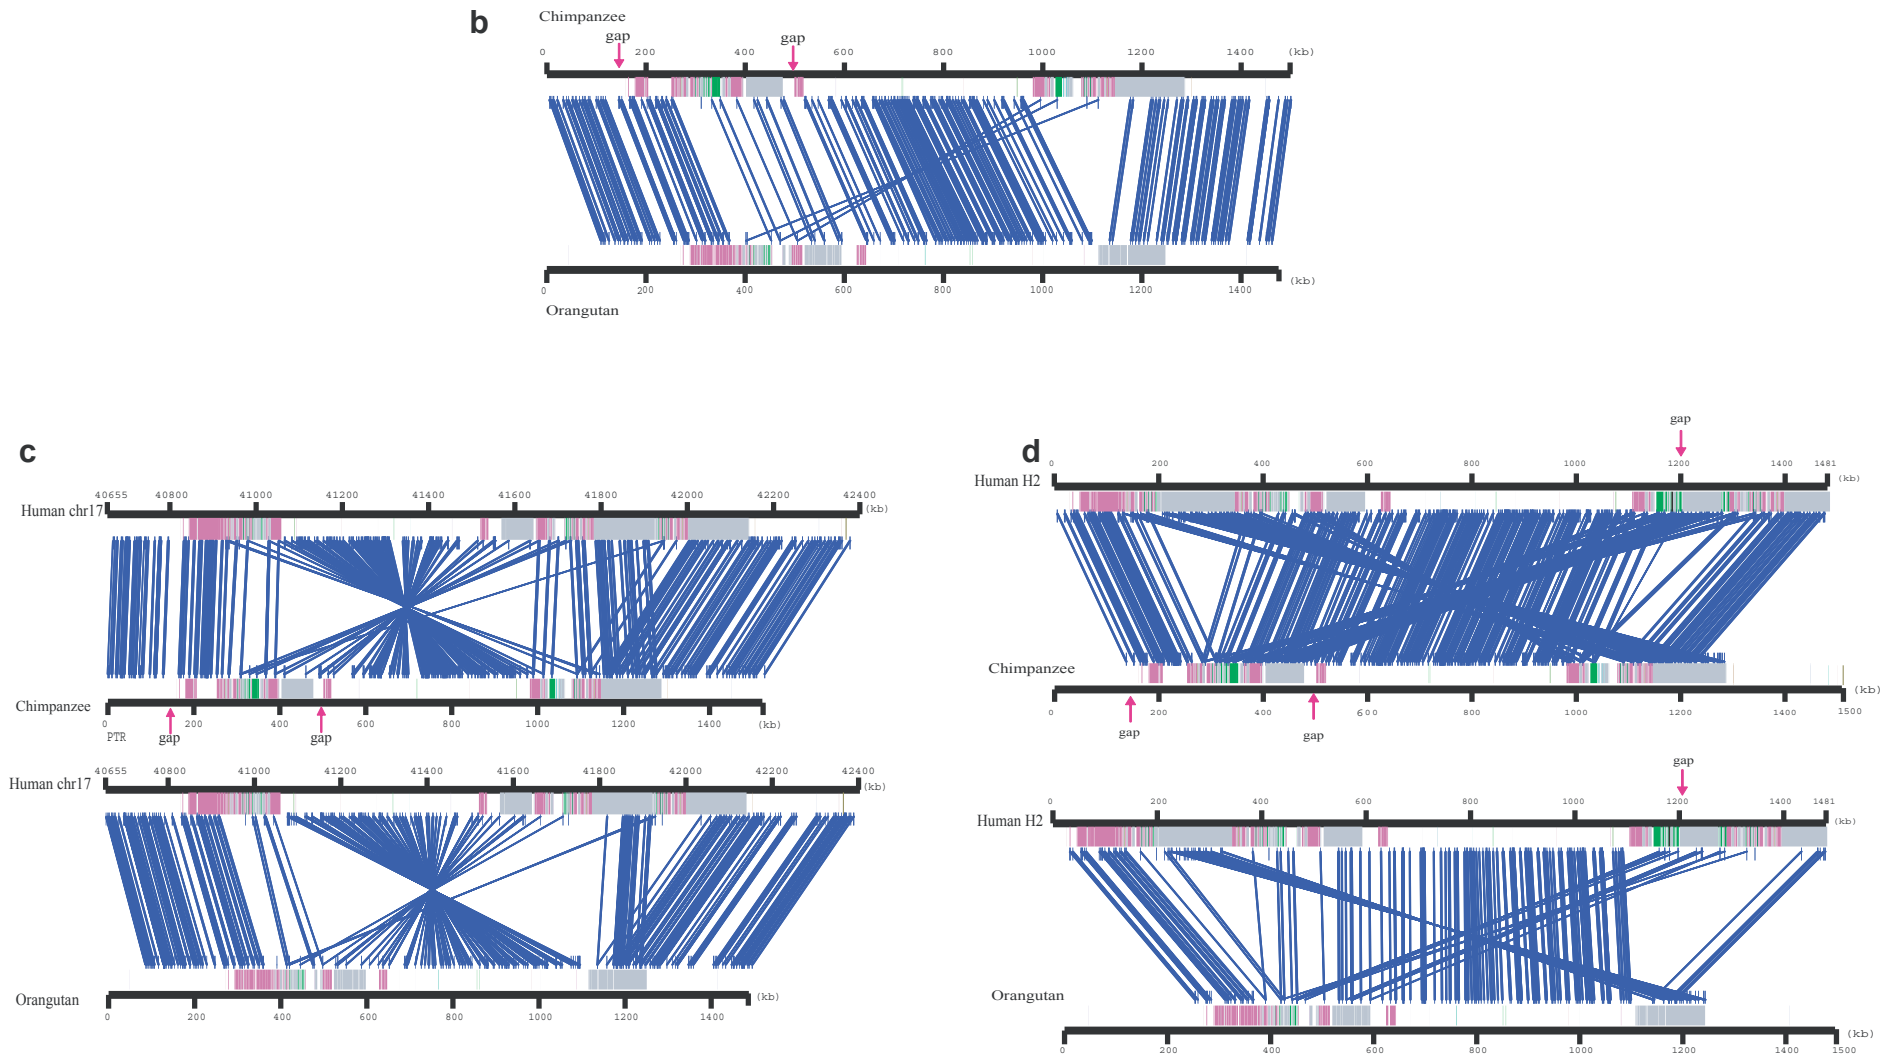

**Supplementary Figure 1: Pairwise sequence comparison of chr17q21.31 region among primates (continue).**

(b) Chimpanzee (top) vs. Orangutan (bottom) sequence comparison compared as described above. We observe a 170 kb segmental duplication from proximal to distal duplication block within chimpanzee but not in orangutan creating a proximal and distal copy of the core. The data suggest that the event occurred in the common ancestor of chimpanzee and human (6-12 million years ago). (c) Human assemblies of non-inverted (H1) 17q21.31 region compared against BAC-based assembly of chimpanzee (PTR) and WGS-based assembly of orangutan. (d) BAC-based sequence assembly of inverted 17q21.31 region compared against BAC-based assembly of chimpanzee (PTR) and WGS-based assembly of orangutan shows ~200 kbp of higher identity homology between analogous segmental duplications (crisscross pattern).

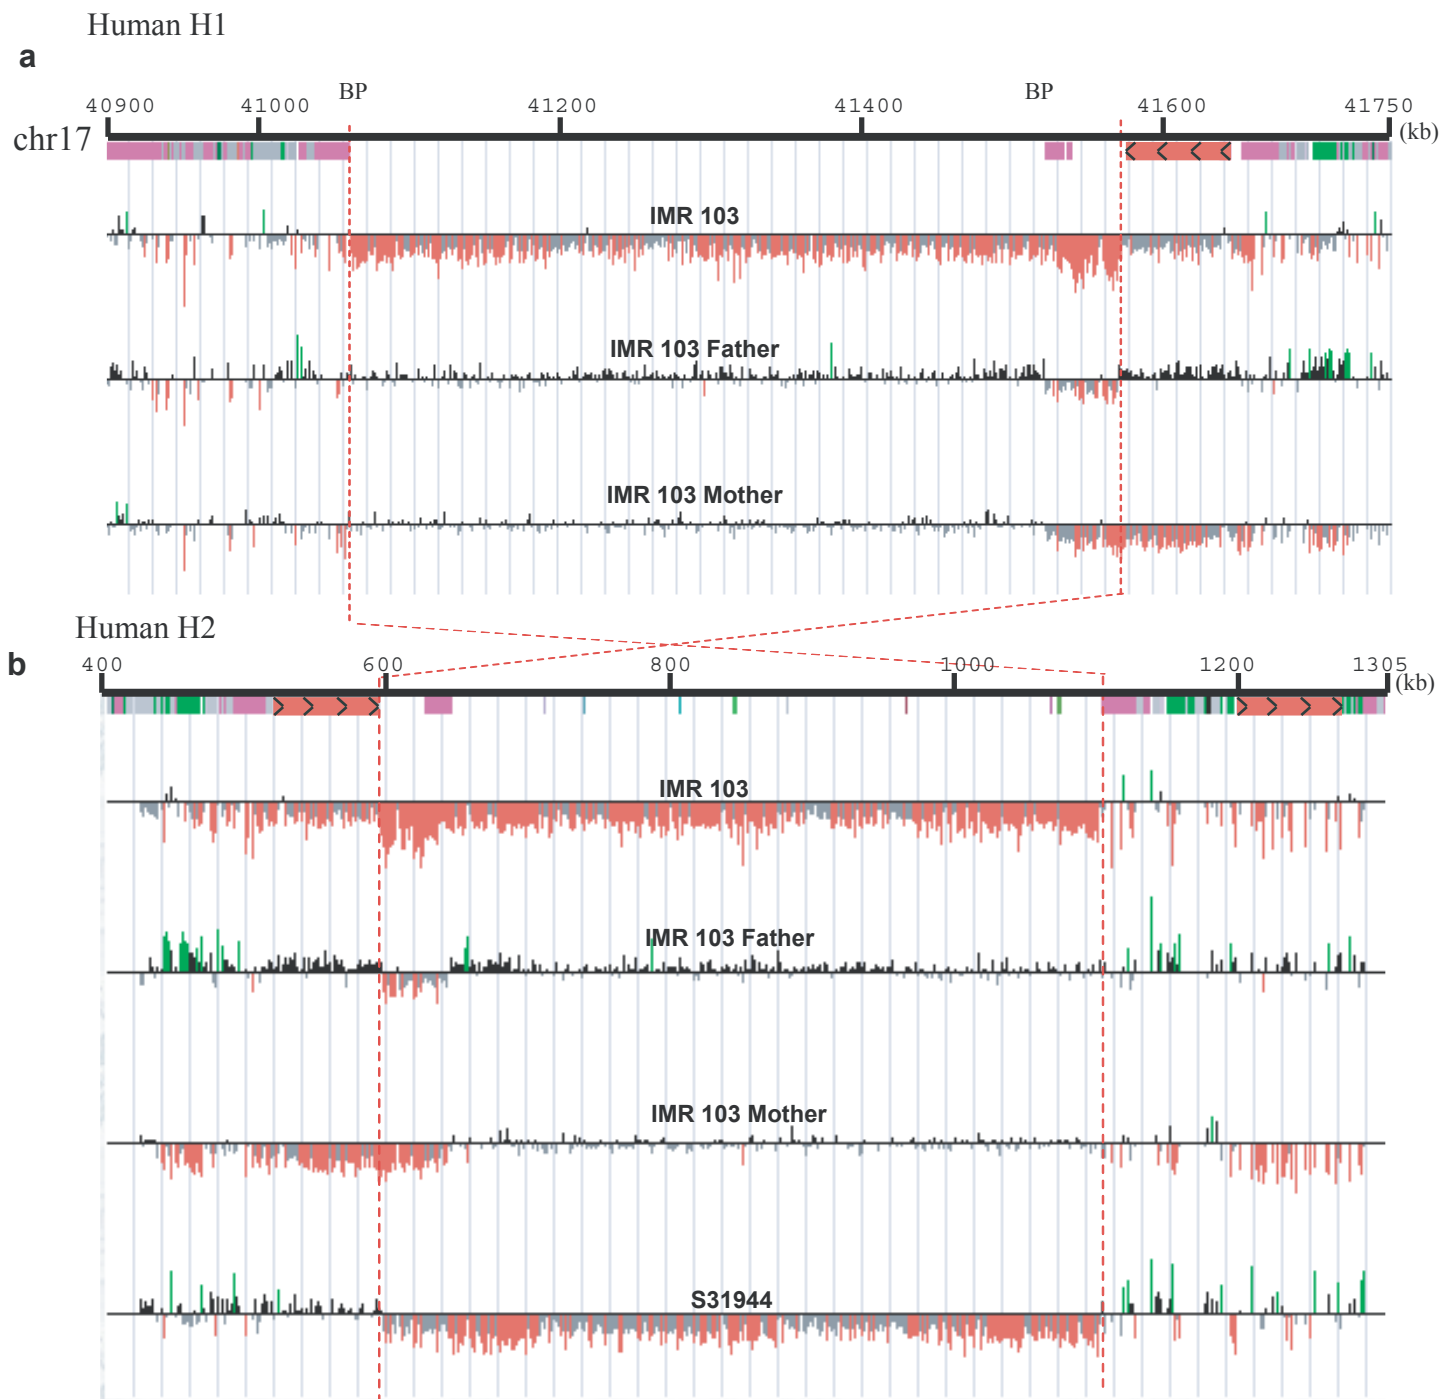

**Supplementary Figure 2: Chr17q21.31 microdeletion breakpoints.**

We remapped the oligonucleotides used microarray comparative genomic hybridization experiments (Sharp et al, 2006) to both the H1 and H2 haplotypes. Array CGH data are shown for parents and a child (IMR103) with mental retardation against both an a) H1 and b) H2 sequence haplotype. The microdeletion was shown to have occurred on the H2 chromosome of the father of IMR103. The pair of “H2-specific” duplications (red color with internal arrows) are shown with respect to the microdeletion breakpoints (red dashed lines). Precise localization of breakpoints is confounded by segmental duplications and copy-number polymorphism, but an examination another de novo microdeletions consistently places one of the breakpoints in or within 1 kbp of the H2-specific segmental duplication (e.g. patient S31944). Although we have fairly clear evidence that the microdeletion breakpoint occurs within proximal breakpoint near the “H2-specific” segmental duplication, we have less mapping precision at the distal end due to the CNP that exists between H2 coordinates 1103477-1197879. So even though the distal breakpoint signal ends abruptly by the distal duplication block, due to the CNP of that region the distal breakpoint could still map closer to the internal H2-specific duplicon (i.e. a reduction in copy would not necessarily be expected to show a detectable difference when compared to an H1/H1 haplotype reference).

Supplementary Table 1: Pairwise sequence alignments ( $\geq 90\%$  identity,  $\geq 1$  kbp) among 4 assemblies

| QNAME | QB     | QE      | QLEN    | SNAME | SB      | SE      | per SE    | SE_sim    | K2p       | SE_kimura |
|-------|--------|---------|---------|-------|---------|---------|-----------|-----------|-----------|-----------|
| H1    | 129729 | 150021  | 1405709 | H1    | 981035  | 963600  | 0.9816757 | NA        | 0.018573  | 0.001046  |
| H1    | 129729 | 150021  | 1405709 | H1    | 1198970 | 1181462 | 0.9823263 | NA        | 0.0179037 | 0.0010243 |
| H1    | 146032 | 150021  | 1405709 | H1    | 150025  | 154014  | 0.9989975 | 0.000501  | 0.0010033 | 0.0005018 |
| H1    | 150025 | 207448  | 1405709 | H1    | 1185446 | 1123304 | 0.983541  | NA        | 0.0166546 | 0.0005443 |
| H1    | 150025 | 187318  | 1405709 | H1    | 967593  | 925941  | 0.9803974 | NA        | 0.0198783 | 0.0007393 |
| H1    | 158243 | 159594  | 1405709 | H1    | 232620  | 233843  | 0.9010152 | 0.0086864 | 0.1070585 | 0.0101912 |
| H1    | 219599 | 226634  | 1405709 | H1    | 894677  | 887698  | 0.9835141 | 0.0015313 | 0.0166946 | 0.0015704 |
| H1    | 227453 | 261693  | 1405709 | H1    | 886258  | 850934  | 0.9884582 | 0.0005826 | 0.011645  | 0.000593  |
| H1    | 230482 | 233843  | 1405709 | H1    | 958106  | 954620  | 0.9095907 | 0.0050118 | 0.0969868 | 0.0057809 |
| H1    | 230482 | 233843  | 1405709 | H1    | 1175961 | 1172475 | 0.9098962 | 0.0050041 | 0.096629  | 0.0057683 |
| H1    | 879862 | 883229  | 1405709 | H1    | 954620  | 958106  | 0.911084  | 0.0049667 | 0.0953039 | 0.0057189 |
| H1    | 879862 | 883229  | 1405709 | H1    | 1172475 | 1175961 | 0.9113886 | 0.004959  | 0.0949479 | 0.0057064 |
| H1    | 925941 | 1123304 | 1405709 | H1    | 1143518 | 1341017 | 0.9981153 | NA        | 0.0018875 | 9.80E-05  |
| H1    | 1      | 150021  | 1405709 | H2    | 1       | 147152  | 0.99632   | NA        | 0.0036902 | 0.0001588 |
| H1    | 129729 | 150021  | 1405709 | H2    | 347549  | 365072  | 0.9818818 | NA        | 0.0183623 | 0.0010374 |
| H1    | 129729 | 150021  | 1405709 | H2    | 1391378 | 1373864 | 0.9820425 | NA        | 0.0181954 | 0.0010328 |
| H1    | 150025 | 207448  | 1405709 | H2    | 143159  | 205298  | 0.9834128 | NA        | 0.0167853 | 0.0005465 |
| H1    | 150025 | 219717  | 1405709 | H2    | 361079  | 435489  | 0.9841496 | NA        | 0.0160331 | 0.0004847 |
| H1    | 150025 | 205626  | 1405709 | H2    | 1377857 | 1317537 | 0.9826352 | NA        | 0.0175814 | 0.0005687 |
| H1    | 212314 | 219747  | 1405709 | H2    | 1186182 | 1175766 | 0.9865229 | 0.0013386 | 0.0136112 | 0.0013654 |
| H1    | 219599 | 261693  | 1405709 | H2    | 469149  | 513195  | 0.9873231 | 0.0005497 | 0.0127997 | 0.0005605 |
| H1    | 219599 | 926076  | 1405709 | H2    | 1146505 | 437775  | 0.9948377 | NA        | 0.0051828 | 8.62E-05  |
| H1    | 219599 | 247714  | 1405709 | H2    | 1316783 | 1289117 | 0.9875109 | 0.0006691 | 0.0126098 | 0.0006822 |
| H1    | 230482 | 233843  | 1405709 | H2    | 370571  | 374065  | 0.9107852 | 0.0049826 | 0.0956032 | 0.0057345 |
| H1    | 230482 | 233843  | 1405709 | H2    | 152652  | 156148  | 0.9086465 | 0.005036  | 0.098019  | 0.005811  |
| H1    | 230482 | 233843  | 1405709 | H2    | 1368369 | 1364872 | 0.9099237 | 0.0050027 | 0.0966123 | 0.0057683 |
| H1    | 769304 | 844580  | 1405709 | H2    | 1273881 | 1198880 | 0.9955597 | NA        | 0.0044555 | 0.0002448 |
| H1    | 850934 | 886258  | 1405709 | H2    | 1103477 | 1138618 | 0.99032   | 0.0005271 | 0.0097523 | 0.000535  |
| H1    | 865792 | 886258  | 1405709 | H2    | 1289117 | 1308890 | 0.9929406 | 0.0005967 | 0.0070983 | 0.0006033 |
| H1    | 879862 | 883229  | 1405709 | H2    | 374065  | 370571  | 0.9128846 | 0.0049218 | 0.0932312 | 0.0056493 |
| H1    | 879862 | 883229  | 1405709 | H2    | 156148  | 152652  | 0.911057  | 0.0049681 | 0.0953052 | 0.0057171 |
| H1    | 879862 | 883229  | 1405709 | H2    | 1364872 | 1368369 | 0.9123288 | 0.0049344 | 0.0938953 | 0.0056725 |
| H1    | 887698 | 911684  | 1405709 | H2    | 1139437 | 1163543 | 0.9865985 | 0.0007441 | 0.0135392 | 0.0007595 |
| H1    | 887698 | 895435  | 1405709 | H2    | 1309709 | 1317540 | 0.9831278 | 0.0014672 | 0.0170986 | 0.001507  |
| H1    | 907113 | 911684  | 1405709 | H2    | 1197879 | 1193288 | 0.9901445 | 0.0014619 | 0.0099302 | 0.0014842 |
| H1    | 910905 | 926076  | 1405709 | H2    | 1289120 | 1273938 | 0.9849156 | 0.0009914 | 0.015261  | 0.0010148 |
| H1    | 916037 | 926076  | 1405709 | H2    | 1163440 | 1173502 | 0.9902332 | 0.0009818 | 0.0098355 | 0.0009956 |
| H1    | 916037 | 923242  | 1405709 | H2    | 1193391 | 1186179 | 0.9895833 | 0.0011965 | 0.010495  | 0.0012146 |
| H1    | 925941 | 1198970 | 1405709 | H2    | 403035  | 129631  | 0.9978491 | NA        | 0.0021544 | 8.90E-05  |
| H1    | 925941 | 1071136 | 1405709 | H2    | 1335915 | 1481052 | 0.997421  | 0.0001334 | 0.002584  | 0.0001339 |

|    |         |         |             |         |         |           |           |           |           |
|----|---------|---------|-------------|---------|---------|-----------|-----------|-----------|-----------|
| H1 | 954620  | 958106  | 1405709 H2  | 484902  | 481538  | 0.9093407 | 0.0050165 | 0.0973116 | 0.0057933 |
| H1 | 954620  | 958106  | 1405709 H2  | 1132239 | 1135600 | 0.9095907 | 0.0050118 | 0.0970019 | 0.0057828 |
| H1 | 954620  | 958106  | 1405709 H2  | 1302509 | 1305872 | 0.9098962 | 0.0050041 | 0.096644  | 0.0057702 |
| H1 | 1123304 | 1146564 | 1405709 H2  | 423242  | 400003  | 0.9978908 | 0.000301  | 0.0021123 | 0.0003019 |
| H1 | 1124829 | 1288708 | 1405709 H2  | 1317451 | 1481052 | 0.9976384 | NA        | 0.0023658 | 0.0001205 |
| H1 | 1172475 | 1175961 | 1405709 H2  | 484902  | 481538  | 0.9096459 | 0.0050089 | 0.096969  | 0.0057827 |
| H1 | 1172475 | 1175961 | 1405709 H2  | 1132239 | 1135600 | 0.9098962 | 0.0050041 | 0.0966592 | 0.0057721 |
| H1 | 1172475 | 1175961 | 1405709 H2  | 1302509 | 1305872 | 0.9102016 | 0.0049965 | 0.0963014 | 0.0057596 |
| H1 | 1200001 | 1341017 | 1405709 H2  | 346518  | 205298  | 0.9982524 | 0.0001113 | 0.00175   | 0.0001116 |
| H1 | 1       | 27116   | 1405709 PPY | 242371  | 269809  | 0.9618917 | 0.0011819 | 0.0392346 | 0.0012533 |
| H1 | 28340   | 94329   | 1405709 PPY | 270586  | 338746  | 0.9647576 | 0.0007357 | 0.0362236 | 0.0007775 |
| H1 | 48679   | 50223   | 1405709 PPY | 291385  | 292941  | 0.9485677 | 0.0056358 | 0.0534512 | 0.006091  |
| H1 | 95460   | 150021  | 1405709 PPY | 341139  | 389891  | 0.9644631 | NA        | 0.0365232 | 0.0009151 |
| H1 | 150025  | 161007  | 1405709 PPY | 385872  | 399999  | 0.9589368 | NA        | 0.0423496 | 0.0020216 |
| H1 | 178527  | 193979  | 1405709 PPY | 403650  | 416881  | 0.960122  | NA        | 0.0411769 | 0.0018227 |
| H1 | 194330  | 219717  | 1405709 PPY | 417738  | 442977  | 0.9662602 | 0.0011416 | 0.0346294 | 0.001203  |
| H1 | 219599  | 241814  | 1405709 PPY | 476554  | 500383  | 0.9550969 | 0.0014119 | 0.046436  | 0.0015107 |
| H1 | 230481  | 233852  | 1405709 PPY | 395134  | 398623  | 0.9044858 | 0.0051345 | 0.1028433 | 0.0059678 |
| H1 | 242896  | 259027  | 1405709 PPY | 500537  | 517298  | 0.9524689 | 0.0017276 | 0.0492153 | 0.0018531 |
| H1 | 269938  | 393250  | 1405709 PPY | 1110628 | 988615  | 0.9659031 | NA        | 0.0350294 | 0.0005573 |
| H1 | 393057  | 417488  | 1405709 PPY | 987380  | 962841  | 0.9666539 | NA        | 0.0342258 | 0.0012355 |
| H1 | 418796  | 524876  | 1405709 PPY | 962753  | 853399  | 0.963311  | 0.0005828 | 0.0377592 | 0.0006175 |
| H1 | 523579  | 585990  | 1405709 PPY | 852374  | 788701  | 0.9643768 | NA        | 0.0366245 | 0.0007976 |
| H1 | 579487  | 598093  | 1405709 PPY | 788496  | 769490  | 0.9668041 | 0.0013194 | 0.0340955 | 0.0013924 |
| H1 | 599331  | 653468  | 1405709 PPY | 768796  | 714977  | 0.9666287 | 0.0007891 | 0.0342661 | 0.0008322 |
| H1 | 654057  | 758862  | 1405709 PPY | 714223  | 607753  | 0.9680784 | 0.0005499 | 0.0327108 | 0.0005776 |
| H1 | 696651  | 786621  | 1405709 PPY | 669911  | 578769  | 0.9675895 | 0.0005982 | 0.0332297 | 0.000629  |
| H1 | 787663  | 799693  | 1405709 PPY | 577961  | 565887  | 0.9715227 | 0.001529  | 0.0291076 | 0.0015978 |
| H1 | 800373  | 849598  | 1405709 PPY | 565090  | 519425  | 0.9711416 | NA        | 0.0295062 | 0.0008344 |
| H1 | 854471  | 886258  | 1405709 PPY | 517298  | 484236  | 0.9508487 | 0.0012608 | 0.0509674 | 0.0013565 |
| H1 | 879853  | 883230  | 1405709 PPY | 398623  | 395134  | 0.9056317 | 0.0051006 | 0.1015106 | 0.0059165 |
| H1 | 887699  | 926076  | 1405709 PPY | 483426  | 445272  | 0.9628095 | 0.000998  | 0.0382701 | 0.0010572 |
| H1 | 925941  | 934731  | 1405709 PPY | 410255  | 403650  | 0.9491292 | NA        | 0.0530191 | 0.0029526 |
| H1 | 953206  | 981031  | 1405709 PPY | 400000  | 376680  | 0.9548497 | NA        | 0.0467066 | 0.0014705 |
| H1 | 991321  | 1009100 | 1405709 PPY | 1112419 | 1130773 | 0.9630238 | 0.00142   | 0.0380001 | 0.0015002 |
| H1 | 1010319 | 1123300 | 1405709 PPY | 1131744 | 1245883 | 0.9709245 | NA        | 0.0297354 | 0.0005278 |
| H1 | 1123304 | 1136475 | 1405709 PPY | 430770  | 417738  | 0.9683437 | 0.0015403 | 0.0324677 | 0.0016208 |
| H1 | 1136826 | 1152307 | 1405709 PPY | 416881  | 403650  | 0.9594265 | NA        | 0.0419203 | 0.0018403 |
| H1 | 1171061 | 1198966 | 1405709 PPY | 400000  | 376680  | 0.9550944 | NA        | 0.0464385 | 0.0014631 |
| H1 | 1209243 | 1227021 | 1405709 PPY | 1112419 | 1130773 | 0.9629105 | 0.0014221 | 0.0381177 | 0.0015025 |
| H1 | 1228240 | 1373285 | 1405709 PPY | 1131744 | 1277187 | 0.9718322 | NA        | 0.0287915 | 0.0004593 |
| H1 | 1373708 | 1405131 | 1405709 PPY | 1277986 | 1309453 | 0.973362  | 0.0009117 | 0.0271933 | 0.0009503 |
| H1 | 1       | 150021  | 1405709 PTR | 132503  | 280180  | 0.9889582 | NA        | 0.0111353 | 0.0002772 |

|    |         |         |             |         |         |           |           |           |           |
|----|---------|---------|-------------|---------|---------|-----------|-----------|-----------|-----------|
| H1 | 129729  | 150021  | 1405709 PTR | 1144414 | 1124389 | 0.9789284 | 0.0010173 | 0.0214039 | 0.0010498 |
| H1 | 150025  | 186204  | 1405709 PTR | 276184  | 314603  | 0.9819312 | 0.0007017 | 0.0183149 | 0.0007211 |
| H1 | 150025  | 194310  | 1405709 PTR | 1128352 | 1078907 | 0.9800813 | NA        | 0.0202191 | 0.0006862 |
| H1 | 158243  | 159594  | 1405709 PTR | 368933  | 370157  | 0.9003378 | 0.0087055 | 0.1077732 | 0.0102097 |
| H1 | 211222  | 219747  | 1405709 PTR | 314519  | 323032  | 0.9841326 | 0.0013548 | 0.0160585 | 0.0013877 |
| H1 | 219599  | 261693  | 1405709 PTR | 355882  | 398285  | 0.9852015 | 0.0005942 | 0.0149638 | 0.0006076 |
| H1 | 219599  | 393264  | 1405709 PTR | 1024042 | 850371  | 0.9873945 | 0.000269  | 0.0127274 | 0.0002742 |
| H1 | 230482  | 233843  | 1405709 PTR | 1118905 | 1115425 | 0.9098411 | 0.005007  | 0.0967535 | 0.0057799 |
| H1 | 393057  | 744538  | 1405709 PTR | 849129  | 497776  | 0.9892911 | NA        | 0.0107986 | 0.0001771 |
| H1 | 751301  | 886258  | 1405709 PTR | 497708  | 363754  | 0.9907694 | NA        | 0.0092962 | 0.0002656 |
| H1 | 850934  | 886258  | 1405709 PTR | 981545  | 1016187 | 0.9889726 | 0.0005633 | 0.0111202 | 0.0005729 |
| H1 | 879862  | 883229  | 1405709 PTR | 1115425 | 1118905 | 0.9110299 | 0.0049696 | 0.095444  | 0.0057326 |
| H1 | 887698  | 926076  | 1405709 PTR | 362932  | 325293  | 0.9862257 | 0.0006022 | 0.0139223 | 0.0006152 |
| H1 | 887698  | 910935  | 1405709 PTR | 1017009 | 1040257 | 0.9871057 | 0.0007421 | 0.0130242 | 0.0007572 |
| H1 | 925941  | 1123304 | 1405709 PTR | 1085926 | 1286401 | 0.9894673 | NA        | 0.0106166 | 0.0002343 |
| H1 | 927052  | 981035  | 1405709 PTR | 314603  | 261788  | 0.9794679 | NA        | 0.0208515 | 0.0006648 |
| H1 | 954620  | 958106  | 1405709 PTR | 370157  | 366794  | 0.9117827 | 0.0049551 | 0.0944544 | 0.0056929 |
| H1 | 954620  | 958106  | 1405709 PTR | 1009808 | 1013165 | 0.9105617 | 0.0049859 | 0.0958809 | 0.0057431 |
| H1 | 1136495 | 1405709 | 1405709 PTR | 1078907 | 1350934 | 0.9899471 | NA        | 0.0101296 | 0.0001957 |
| H1 | 1144631 | 1198970 | 1405709 PTR | 314603  | 261788  | 0.9791427 | NA        | 0.0211872 | 0.0006679 |
| H1 | 1172475 | 1175961 | 1405709 PTR | 370157  | 366794  | 0.9120879 | 0.0049473 | 0.0941128 | 0.0056822 |
| H1 | 1172475 | 1175961 | 1405709 PTR | 1009808 | 1013165 | 0.9108669 | 0.0049782 | 0.0955239 | 0.0057306 |
| H2 | 129631  | 205298  | 1481053 H2  | 347549  | 423242  | 0.9988895 | NA        | 0.0011115 | 0.0001213 |
| H2 | 129631  | 203770  | 1481053 H2  | 1391378 | 1317451 | 0.9975226 | 0.0001829 | 0.002482  | 0.0001836 |
| H2 | 152652  | 156148  | 1481053 H2  | 481538  | 484902  | 0.9090076 | 0.0050255 | 0.0976711 | 0.005804  |
| H2 | 152652  | 156148  | 1481053 H2  | 1135600 | 1132239 | 0.9092576 | 0.0050208 | 0.0973618 | 0.0057935 |
| H2 | 152652  | 156148  | 1481053 H2  | 1305872 | 1302509 | 0.9095631 | 0.0050132 | 0.0970037 | 0.0057809 |
| H2 | 257472  | 421714  | 1481053 H2  | 1481053 | 1317451 | 0.9985446 | NA        | 0.001457  | 9.45E-05  |
| H2 | 370571  | 374065  | 1481053 H2  | 481538  | 484902  | 0.911145  | 0.004972  | 0.0952586 | 0.0057276 |
| H2 | 370571  | 374065  | 1481053 H2  | 1135600 | 1132239 | 0.9113963 | 0.0049671 | 0.0949485 | 0.0057169 |
| H2 | 370571  | 374065  | 1481053 H2  | 1305872 | 1302509 | 0.9117018 | 0.0049594 | 0.0945915 | 0.0057043 |
| H2 | 428107  | 447822  | 1481053 H2  | 1186182 | 1163440 | 0.9908462 | 0.0006792 | 0.0092177 | 0.0006887 |
| H2 | 437714  | 452954  | 1481053 H2  | 1273877 | 1289120 | 0.9859785 | 0.000954  | 0.0141746 | 0.000975  |
| H2 | 440620  | 447822  | 1481053 H2  | 1186179 | 1193391 | 0.9922233 | 0.0010352 | 0.0078234 | 0.0010476 |
| H2 | 452165  | 513195  | 1481053 H2  | 1163543 | 1103477 | 0.9902065 | 0.0004047 | 0.009866  | 0.0004107 |
| H2 | 452165  | 456744  | 1481053 H2  | 1193288 | 1197879 | 0.9925699 | 0.0012695 | 0.0074713 | 0.0012836 |
| H2 | 468394  | 498328  | 1481053 H2  | 1317540 | 1289117 | 0.991574  | 0.0005439 | 0.0084787 | 0.0005507 |
| H2 | 481538  | 484902  | 1481053 H2  | 1368369 | 1364872 | 0.9102838 | 0.0049921 | 0.0962372 | 0.0057576 |
| H2 | 519560  | 594627  | 1481053 H2  | 1198880 | 1273881 | 0.9974903 | NA        | 0.0025143 | 0.0001835 |
| H2 | 1118360 | 1147260 | 1481053 H2  | 1289117 | 1317540 | 0.9936843 | 0.0004706 | 0.0063468 | 0.0004752 |
| H2 | 1132239 | 1135600 | 1481053 H2  | 1364872 | 1368369 | 0.9105344 | 0.0049874 | 0.0959894 | 0.0057548 |
| H2 | 1158952 | 1170649 | 1481053 H2  | 1197879 | 1186179 | 0.9990596 | 0.0002834 | 0.0009412 | 0.0002839 |
| H2 | 1162742 | 1173563 | 1481053 H2  | 1289120 | 1273877 | 0.9870998 | 0.0010871 | 0.0130276 | 0.0011087 |

|    |         |         |         |     |         |         |           |           |           |           |
|----|---------|---------|---------|-----|---------|---------|-----------|-----------|-----------|-----------|
| H2 | 1186179 | 1193391 | 1481053 | H2  | 1276778 | 1283979 | 0.9849833 | 0.0014341 | 0.0151886 | 0.0014672 |
| H2 | 1302509 | 1305872 | 1481053 | H2  | 1364872 | 1368369 | 0.9108397 | 0.0049797 | 0.095616  | 0.0057402 |
| H2 | 1       | 27119   | 1481053 | PPY | 242371  | 269809  | 0.9618946 | 0.0011818 | 0.0392315 | 0.0012532 |
| H2 | 28343   | 94226   | 1481053 | PPY | 270586  | 338746  | 0.9645905 | 0.0007374 | 0.0363999 | 0.0007795 |
| H2 | 48647   | 50193   | 1481053 | PPY | 291385  | 292941  | 0.9472656 | 0.0057028 | 0.0548563 | 0.0061753 |
| H2 | 95357   | 157562  | 1481053 | PPY | 341139  | 399999  | 0.9618711 | NA        | 0.0392511 | 0.00086   |
| H2 | 176315  | 191792  | 1481053 | PPY | 403650  | 416881  | 0.9599024 | NA        | 0.0414089 | 0.0018277 |
| H2 | 192143  | 205298  | 1481053 | PPY | 417738  | 430770  | 0.967722  | 0.0015549 | 0.0331087 | 0.0016365 |
| H2 | 205302  | 318301  | 1481053 | PPY | 1245883 | 1131744 | 0.9707526 | NA        | 0.0299152 | 0.0005294 |
| H2 | 319524  | 337317  | 1481053 | PPY | 1130768 | 1112419 | 0.9627533 | 0.0014247 | 0.0382831 | 0.0015056 |
| H2 | 347553  | 375479  | 1481053 | PPY | 376680  | 399999  | 0.9547336 | NA        | 0.0468345 | 0.0014697 |
| H2 | 394249  | 397671  | 1481053 | PPY | 403650  | 407056  | 0.9571133 | 0.0034843 | 0.0444301 | 0.0037419 |
| H2 | 400003  | 409727  | 1481053 | PPY | 407223  | 416881  | 0.961667  | 0.0019622 | 0.0395154 | 0.0020861 |
| H2 | 410078  | 509656  | 1481053 | PPY | 417738  | 517298  | 0.9601617 | 0.0006397 | 0.0410552 | 0.0006796 |
| H2 | 481537  | 484911  | 1481053 | PPY | 395134  | 398623  | 0.9057352 | 0.0051035 | 0.1013548 | 0.0059144 |
| H2 | 514533  | 576579  | 1481053 | PPY | 519425  | 577961  | 0.9707427 | NA        | 0.0299186 | 0.000745  |
| H2 | 577621  | 669291  | 1481053 | PPY | 578769  | 669911  | 0.9677103 | 0.0005972 | 0.0331038 | 0.0006279 |
| H2 | 655436  | 711717  | 1481053 | PPY | 656418  | 714133  | 0.969311  | 0.0007363 | 0.0314167 | 0.0007718 |
| H2 | 712392  | 766254  | 1481053 | PPY | 714977  | 768796  | 0.9669806 | 0.0007866 | 0.0338974 | 0.0008292 |
| H2 | 767496  | 786090  | 1481053 | PPY | 769494  | 788496  | 0.9658653 | 0.0013376 | 0.0350961 | 0.0014146 |
| H2 | 779566  | 841910  | 1481053 | PPY | 788701  | 852374  | 0.9650727 | NA        | 0.0358865 | 0.0007892 |
| H2 | 840613  | 926695  | 1481053 | PPY | 853399  | 942648  | 0.9629533 | 0.0006508 | 0.0381403 | 0.0006901 |
| H2 | 842430  | 946620  | 1481053 | PPY | 856807  | 962753  | 0.9630982 | 0.0005898 | 0.037987  | 0.0006253 |
| H2 | 947928  | 972416  | 1481053 | PPY | 962841  | 987380  | 0.9665317 | 0.0011744 | 0.034369  | 0.0012389 |
| H2 | 972223  | 1095235 | 1481053 | PPY | 988615  | 1110628 | 0.9662128 | NA        | 0.0347046 | 0.0005546 |
| H2 | 1107023 | 1123171 | 1481053 | PPY | 517298  | 500537  | 0.951512  | 0.0017434 | 0.050229  | 0.0018719 |
| H2 | 1124254 | 1163533 | 1481053 | PPY | 500383  | 459761  | 0.9591985 | 0.0010253 | 0.0420747 | 0.0010908 |
| H2 | 1132230 | 1135601 | 1481053 | PPY | 398623  | 395134  | 0.9060403 | 0.0050961 | 0.1010402 | 0.0059076 |
| H2 | 1163440 | 1186181 | 1481053 | PPY | 455351  | 435638  | 0.9638186 | 0.0013562 | 0.0371922 | 0.0014335 |
| H2 | 1186179 | 1193391 | 1481053 | PPY | 448127  | 455351  | 0.9623648 | 0.0022553 | 0.0387401 | 0.0023906 |
| H2 | 1193298 | 1197879 | 1481053 | PPY | 459761  | 464573  | 0.9687361 | 0.0025914 | 0.0320338 | 0.0027214 |
| H2 | 1199592 | 1255860 | 1481053 | PPY | 522000  | 577961  | 0.9704927 | NA        | 0.030178  | 0.0007627 |
| H2 | 1256902 | 1273881 | 1481053 | PPY | 578769  | 596514  | 0.9655931 | 0.0014051 | 0.0353287 | 0.0014819 |
| H2 | 1273877 | 1289120 | 1481053 | PPY | 445211  | 460525  | 0.9617852 | 0.0015923 | 0.0393591 | 0.0016898 |
| H2 | 1289117 | 1291076 | 1481053 | PPY | 505786  | 503791  | 0.9627551 | 0.0042772 | 0.0382763 | 0.0045189 |
| H2 | 1291610 | 1317540 | 1481053 | PPY | 502937  | 475791  | 0.9536172 | 0.0013374 | 0.0480056 | 0.0014334 |
| H2 | 1302500 | 1305873 | 1481053 | PPY | 398623  | 395134  | 0.9063453 | 0.0050887 | 0.100696  | 0.005897  |
| H2 | 1317537 | 1328870 | 1481053 | PPY | 428921  | 417738  | 0.9672381 | 0.0016865 | 0.0336086 | 0.0017754 |
| H2 | 1329221 | 1344702 | 1481053 | PPY | 416881  | 403650  | 0.95975   | NA        | 0.0415767 | 0.001832  |
| H2 | 1363466 | 1391374 | 1481053 | PPY | 399991  | 376680  | 0.9546545 | NA        | 0.046912  | 0.0014712 |
| H2 | 1401594 | 1419391 | 1481053 | PPY | 1112419 | 1130773 | 0.9630426 | 0.0014193 | 0.0379792 | 0.0014993 |
| H2 | 1420610 | 1481053 | 1481053 | PPY | 1131744 | 1193032 | 0.9691186 | 0.0007116 | 0.0316272 | 0.0007466 |
| H2 | 1       | 183999  | 1481053 | PTR | 132503  | 314603  | 0.9868346 | NA        | 0.013298  | 0.0002761 |

|     |         |         |         |     |         |         |           |           |           |           |
|-----|---------|---------|---------|-----|---------|---------|-----------|-----------|-----------|-----------|
| H2  | 129631  | 192123  | 1481053 | PTR | 1144414 | 1078907 | 0.9828339 | NA        | 0.0173866 | 0.0005358 |
| H2  | 152652  | 156148  | 1481053 | PTR | 366794  | 370157  | 0.9108397 | 0.0049797 | 0.0955115 | 0.0057269 |
| H2  | 152652  | 156148  | 1481053 | PTR | 1013165 | 1009808 | 0.9096183 | 0.0050103 | 0.0969253 | 0.0057752 |
| H2  | 205298  | 410058  | 1481053 | PTR | 1286401 | 1078907 | 0.9891775 | NA        | 0.0109111 | 0.0002332 |
| H2  | 347549  | 401934  | 1481053 | PTR | 261788  | 314603  | 0.9790659 | NA        | 0.0212662 | 0.0006691 |
| H2  | 370571  | 374065  | 1481053 | PTR | 366794  | 370157  | 0.9129771 | 0.0049254 | 0.093105  | 0.00565   |
| H2  | 370571  | 374065  | 1481053 | PTR | 1013165 | 1009808 | 0.9117557 | 0.0049565 | 0.0945146 | 0.0056985 |
| H2  | 427014  | 612632  | 1481053 | PTR | 314519  | 497708  | 0.9891334 | NA        | 0.0109566 | 0.0002467 |
| H2  | 452924  | 513195  | 1481053 | PTR | 1040257 | 981545  | 0.9874117 | 0.0004617 | 0.0127074 | 0.0004705 |
| H2  | 481538  | 484902  | 1481053 | PTR | 1118905 | 1115425 | 0.9093407 | 0.0050165 | 0.0973428 | 0.0057973 |
| H2  | 619419  | 972416  | 1481053 | PTR | 497776  | 849129  | 0.9892877 | NA        | 0.0108018 | 0.0001772 |
| H2  | 972209  | 1162772 | 1481053 | PTR | 850371  | 1040257 | 0.9873555 | 0.000257  | 0.0127674 | 0.000262  |
| H2  | 1103477 | 1186182 | 1481053 | PTR | 398285  | 315609  | 0.9856409 | 0.0004243 | 0.0145156 | 0.0004336 |
| H2  | 1132239 | 1135600 | 1481053 | PTR | 1115425 | 1118905 | 0.9095907 | 0.0050118 | 0.0971125 | 0.0057967 |
| H2  | 1186179 | 1197879 | 1481053 | PTR | 328142  | 343521  | 0.986637  | 0.0010627 | 0.0135007 | 0.0010848 |
| H2  | 1194059 | 1197879 | 1481053 | PTR | 1040257 | 1036434 | 0.9887257 | 0.0017096 | 0.0113764 | 0.0017408 |
| H2  | 1198880 | 1273881 | 1481053 | PTR | 404658  | 479773  | 0.9914605 | NA        | 0.0085943 | 0.0003407 |
| H2  | 1273877 | 1289120 | 1481053 | PTR | 325232  | 339740  | 0.9822899 | 0.001097  | 0.0179521 | 0.0011273 |
| H2  | 1289117 | 1317540 | 1481053 | PTR | 383423  | 355147  | 0.9858885 | 0.0007032 | 0.0142654 | 0.0007187 |
| H2  | 1289117 | 1317540 | 1481053 | PTR | 996420  | 1024778 | 0.9865225 | 0.0006876 | 0.0136153 | 0.0007018 |
| H2  | 1302509 | 1305872 | 1481053 | PTR | 1115425 | 1118905 | 0.9098962 | 0.0050041 | 0.0967375 | 0.005782  |
| H2  | 1328890 | 1481053 | 1481053 | PTR | 1078907 | 1234192 | 0.9880938 | NA        | 0.0120128 | 0.0002839 |
| H2  | 1337017 | 1391378 | 1481053 | PTR | 314603  | 261788  | 0.9791056 | NA        | 0.0212226 | 0.0006683 |
| H2  | 1364872 | 1368369 | 1481053 | PTR | 370157  | 366794  | 0.9121147 | 0.0049459 | 0.0940966 | 0.0056821 |
| H2  | 1364872 | 1368369 | 1481053 | PTR | 1009808 | 1013165 | 0.9108941 | 0.0049768 | 0.0955226 | 0.0057324 |
| PPY | 199253  | 201421  | 1450000 | PPY | 201686  | 203878  | 0.9935395 | 0.0017211 | 0.0064903 | 0.001737  |
| PPY | 218814  | 221070  | 1450000 | PPY | 221081  | 223353  | 0.9924612 | 0.0018215 | 0.0075798 | 0.0018414 |
| PPY | 781566  | 788500  | 1450000 | PPY | 788701  | 795440  | 0.9900062 | 0.001243  | 0.0100697 | 0.001262  |
| PPY | 851072  | 852374  | 1450000 | PPY | 853399  | 854701  | 0.9923195 | 0.0024194 | 0.0077261 | 0.0024483 |
| PPY | 1010628 | 1012303 | 1450000 | PPY | 1012377 | 1014051 | 0.9928358 | 0.0020607 | 0.0072119 | 0.0020883 |
| PPY | 103703  | 131823  | 1450000 | PTR | 1       | 27203   | 0.9699659 | 0.0010557 | 0.0307334 | 0.0011058 |
| PPY | 132555  | 201357  | 1450000 | PTR | 28121   | 95958   | 0.9700295 | 0.0006597 | 0.0306969 | 0.0006923 |
| PPY | 201691  | 218321  | 1450000 | PTR | 93836   | 110265  | 0.9693167 | 0.0013661 | 0.0314284 | 0.0014336 |
| PPY | 218814  | 221203  | 1450000 | PTR | 111231  | 114118  | 0.9636671 | 0.003846  | 0.0374463 | 0.0040872 |
| PPY | 221081  | 269809  | 1450000 | PTR | 111231  | 159659  | 0.9616596 | 0.0008919 | 0.0394808 | 0.0009461 |
| PPY | 270586  | 338746  | 1450000 | PTR | 160885  | 226661  | 0.9649428 | 0.0007344 | 0.0360241 | 0.0007757 |
| PPY | 291385  | 292941  | 1450000 | PTR | 181204  | 182740  | 0.9509804 | 0.0055198 | 0.0508403 | 0.005941  |
| PPY | 341139  | 400000  | 1450000 | PTR | 227789  | 287175  | 0.9641067 | NA        | 0.0368966 | 0.0008569 |
| PPY | 376680  | 399999  | 1450000 | PTR | 1144410 | 1114034 | 0.9552048 | NA        | 0.0463342 | 0.0014703 |
| PPY | 395134  | 398623  | 1450000 | PTR | 366793  | 370166  | 0.9066789 | 0.0050798 | 0.100319  | 0.0058845 |
| PPY | 395134  | 398623  | 1450000 | PTR | 1013166 | 1009799 | 0.9041514 | 0.0051433 | 0.1032538 | 0.0059842 |
| PPY | 403650  | 409165  | 1450000 | PTR | 306982  | 314603  | 0.9511568 | NA        | 0.0508351 | 0.0031663 |
| PPY | 403650  | 416881  | 1450000 | PTR | 1094702 | 1079238 | 0.9598902 | NA        | 0.0413901 | 0.0018254 |



|     |         |         |         |     |         |         |           |           |           |           |
|-----|---------|---------|---------|-----|---------|---------|-----------|-----------|-----------|-----------|
| PPY | 434537  | 474687  | 1450000 | PTR | 314519  | 353259  | 0.9622813 | 0.0009847 | 0.0388348 | 0.0010442 |
| PPY | 459662  | 517298  | 1450000 | PTR | 338843  | 394742  | 0.955081  | 0.0009036 | 0.0464541 | 0.000967  |
| PPY | 460495  | 517298  | 1450000 | PTR | 1040257 | 985090  | 0.9559691 | 0.0009024 | 0.0454952 | 0.0009639 |
| PPY | 519425  | 577961  | 1450000 | PTR | 399621  | 461679  | 0.9710717 | NA        | 0.0295742 | 0.0007406 |
| PPY | 578769  | 615335  | 1450000 | PTR | 462722  | 497708  | 0.9666705 | 0.0009646 | 0.0342089 | 0.0010165 |
| PPY | 621805  | 714223  | 1450000 | PTR | 497776  | 587896  | 0.9685643 | 0.0005876 | 0.0322011 | 0.0006167 |
| PPY | 714977  | 763543  | 1450000 | PTR | 588482  | 637892  | 0.9655646 | 0.0008384 | 0.0353944 | 0.000886  |
| PPY | 717996  | 768796  | 1450000 | PTR | 592464  | 642125  | 0.9650628 | 0.00083   | 0.0359209 | 0.0008777 |
| PPY | 769486  | 788496  | 1450000 | PTR | 643357  | 662010  | 0.9658611 | 0.0013367 | 0.0350985 | 0.0014134 |
| PPY | 788701  | 825374  | 1450000 | PTR | 655473  | 691736  | 0.9645258 | NA        | 0.0364796 | 0.00104   |
| PPY | 826170  | 852374  | 1450000 | PTR | 692334  | 717597  | 0.9672581 | 0.00113   | 0.0335935 | 0.00119   |
| PPY | 853399  | 893251  | 1450000 | PTR | 716300  | 753908  | 0.9623322 | 0.0009915 | 0.0387897 | 0.0010519 |
| PPY | 894076  | 962753  | 1450000 | PTR | 754433  | 823358  | 0.9641042 | NA        | 0.036928  | 0.0007603 |
| PPY | 962841  | 1110628 | 1450000 | PTR | 824666  | 973271  | 0.9661971 | NA        | 0.034718  | 0.0005046 |
| PPY | 1112419 | 1130773 | 1450000 | PTR | 1154751 | 1172537 | 0.9636045 | 0.0014089 | 0.0373943 | 0.0014878 |
| PPY | 1131744 | 1155292 | 1450000 | PTR | 1173756 | 1197011 | 0.9722748 | 0.0010892 | 0.0283301 | 0.0011375 |
| PPY | 1155706 | 1277186 | 1450000 | PTR | 1197430 | 1318598 | 0.9724457 | NA        | 0.0281512 | 0.000496  |
| PPY | 1277986 | 1309453 | 1450000 | PTR | 1319021 | 1350361 | 0.9731759 | 0.0009152 | 0.0273846 | 0.000954  |
| PPY | 1310383 | 1337243 | 1450000 | PTR | 1351013 | 1376929 | 0.9629851 | 0.001193  | 0.0381427 | 0.0012674 |
| PPY | 1337285 | 1379266 | 1450000 | PTR | 1378506 | 1420133 | 0.9651755 | 0.000907  | 0.0357989 | 0.0009588 |
| PPY | 1380332 | 1382491 | 1450000 | PTR | 1421309 | 1423469 | 0.9693878 | 0.00371   | 0.0314109 | 0.0039073 |
| PPY | 1380337 | 1386786 | 1450000 | PTR | 1421314 | 1427885 | 0.9655849 | 0.0024343 | 0.0353631 | 0.0025711 |
| PPY | 1388100 | 1400795 | 1450000 | PTR | 1429052 | 1441605 | 0.9648806 | 0.0017058 | 0.0361356 | 0.0018066 |
| PPY | 1403409 | 1410348 | 1450000 | PTR | 1443147 | 1449999 | 0.9620409 | 0.002369  | 0.039139  | 0.0025197 |
| PTR | 261788  | 314603  | 1450000 | PTR | 1144414 | 1087024 | 0.9803464 | NA        | 0.0199441 | 0.0006275 |
| PTR | 339710  | 398285  | 1450000 | PTR | 1040257 | 981545  | 0.9942617 | 0.0003126 | 0.0057638 | 0.0003154 |
| PTR | 366794  | 370157  | 1450000 | PTR | 1118905 | 1115425 | 0.9126451 | 0.0049346 | 0.0935511 | 0.0056722 |
| PTR | 1009808 | 1013165 | 1450000 | PTR | 1115425 | 1118905 | 0.9114233 | 0.0049657 | 0.0949792 | 0.0057228 |

A BLAST-based comparison (WGAC) method identified all pairwise sequence alignments (size  $\geq 1$  kb and  $\geq 90\%$  identity) among the 4 sequence assemblies: human H1, human H2, chimpanzee (PTR) and orangutan (PPY). Per\_SE: % of sequence identity; K2p: Kimura 2 parameter. QNAME=query name; SNAME=subject name. All coordinates are based on the clone-based sequence assembly (supplementary file).

Supplementary Table 2 a: Inversion breakpoint intervals

| Sequence | Inversion proximal BP |          | Inversion distal BP |          |
|----------|-----------------------|----------|---------------------|----------|
|          | start                 | end      | start               | end      |
| H1       | 158471                | 185471   | 1128131             | 1198728  |
| chr17*   | 40957727              | 40984727 | 41926919            | 41997516 |
| H2       | 158373                | 185373   | 1320541             | 1391072  |

\*Inversion breakpoints (BP) were identified based on comparison of H1 and H2 sequence assembly.

\* The breakpoints of H1 were also mapped to human genome assembly (build36) at chr17.

Supplementary Table 2 b: Core segmental duplication intervals (10 kb chaining)

| sequence | start   | end     | length |
|----------|---------|---------|--------|
| H1       | 144187  | 180281  | 36095  |
| H1       | 932976  | 969438  | 36463  |
| H1       | 1150544 | 1187293 | 36750  |
| H2       | 141313  | 178076  | 36764  |
| H2       | 359233  | 396011  | 36779  |
| H2       | 1342939 | 1379705 | 36767  |
| PTR      | 300915  | 308751  | 7837   |
| PTR      | 1092945 | 1130188 | 37244  |
| PTR      | 1595520 | 1603326 | 7807   |
| PPY      | 403545  | 405392  | 1848   |

Position of core segmental duplications based on 10 kbp chaining method as described by Jiang et al., 2007.

Supplementary Table 2 c: Core segmental duplication intervals (5 kb chaining)

| core | start   | end     | length |
|------|---------|---------|--------|
| H1   | 172804  | 180281  | 7478   |
| H1   | 932976  | 940455  | 7480   |
| H1   | 1150544 | 1158030 | 7487   |
| H2   | 170595  | 178076  | 7482   |
| H2   | 388526  | 396011  | 7486   |
| H2   | 1342939 | 1350427 | 7489   |
| PTR  | 300915  | 308751  | 7837   |
| PTR  | 1092945 | 1100348 | 7404   |
| PTR  | 1595520 | 1603326 | 7807   |
| PPY  | 403545  | 405392  | 1848   |

More stringent core segmental duplication interval as defined by chaining core duplicons within 5kb.

Supplementary Table 3: Pairwise sequence alignments (>5 kb) flanking inverted region

Human H1 vs. H1

| QNAME | QB | QE     | QLEN   | SNAME      | SB | SE      | Length  | Per_sim | K2p         | Orientation |          |
|-------|----|--------|--------|------------|----|---------|---------|---------|-------------|-------------|----------|
| H1    |    | 129729 | 150021 | 1405709 H1 |    | 981035  | 963600  | 17354   | 0.981675694 | 0.018572994 | Inverted |
| H1    |    | 129729 | 150021 | 1405709 H1 |    | 1198970 | 1181462 | 17427   | 0.982326275 | 0.017903657 | Inverted |
| H1    |    | 150025 | 207448 | 1405709 H1 |    | 1185446 | 1123304 | 57294   | 0.983541034 | 0.016654597 | Inverted |
| H1    |    | 150025 | 187318 | 1405709 H1 |    | 967593  | 925941  | 37189   | 0.980397429 | 0.019878259 | Inverted |
| H1    |    | 219599 | 226634 | 1405709 H1 |    | 894677  | 887698  | 6915    | 0.9835141   | 0.016694636 | inverted |
| H1    |    | 227453 | 261693 | 1405709 H1 |    | 886258  | 850934  | 33617   | 0.988458221 | 0.011645017 | Inverted |
| sum   |    |        |        |            |    |         |         | 169796  | 0.983318792 | 0.016891527 |          |

Human H1 vs. H1

| QNAME     | QB | QE            | QLEN          | SNAME             | SB | SE             | Length         | Per_sim      | K2p                | Orientation        |               |
|-----------|----|---------------|---------------|-------------------|----|----------------|----------------|--------------|--------------------|--------------------|---------------|
| H2        |    | 129631        | 203770        | 1481053 H2        |    | 1391378        | 1317451        | 73867        | 0.997522574        | 0.002482041        | Inverted      |
| H2        |    | 257472        | 421714        | 1481053 H2        |    | 1481053        | 1317451        | 163531       | 0.998544618        | 0.001456983        | Inverted      |
| H2        |    | 428107        | 447822        | 1481053 H2        |    | 1186182        | 1163440        | 19664        | 0.990846216        | 0.009217729        | Inverted      |
| <b>H2</b> |    | <b>437714</b> | <b>452954</b> | <b>1481053 H2</b> |    | <b>1273877</b> | <b>1289120</b> | <b>15191</b> | <b>0.98597854</b>  | <b>0.014174647</b> | <b>Direct</b> |
| <b>H2</b> |    | <b>440620</b> | <b>447822</b> | <b>1481053 H2</b> |    | <b>1186179</b> | <b>1193391</b> | <b>7201</b>  | <b>0.992223302</b> | <b>0.007823391</b> | <b>Direct</b> |
| H2        |    | 452165        | 513195        | 1481053 H2        |    | 1163543        | 1103477        | 59223        | 0.990206508        | 0.009866043        | Inverted      |
| H2        |    | 468394        | 498328        | 1481053 H2        |    | 1317540        | 1289117        | 28246        | 0.991574028        | 0.008478729        | Inverted      |
| <b>H2</b> |    | <b>519560</b> | <b>594627</b> | <b>1481053 H2</b> |    | <b>1198880</b> | <b>1273881</b> | <b>74909</b> | <b>0.997490288</b> | <b>0.002514289</b> | <b>Direct</b> |
| sum       |    |               |               |                   |    |                |                | 441832       | 0.993048259        | 0.007001732        |               |

Chimpanzee vs. Chimpanzee Clone Assembly

| QNAME | QB | QE     | QLEN   | SNAME       | SB | SE      | Length  | Per_sim | K2p         | Orientation |          |
|-------|----|--------|--------|-------------|----|---------|---------|---------|-------------|-------------|----------|
| PTR   |    | 261788 | 314603 | 1450000 PTR |    | 1144414 | 1087024 | 51899   | 0.980346442 | 0.019944123 | Inverted |
| PTR   |    | 339710 | 398285 | 1450000 PTR |    | 1040257 | 981545  | 58380   | 0.994261733 | 0.00576378  | Inverted |
| sum   |    |        |        |             |    |         |         | 110279  | 0.987304088 | 0.012853952 |          |

Orangutan vs. Orangutan Clone Assembly

| QNAME | QB | QE | QLEN | SNAME | SB | SE | Length | Per_sim | K2p | Orientation |    |
|-------|----|----|------|-------|----|----|--------|---------|-----|-------------|----|
| PPY   |    | 0  | 0    | 0 PPY |    | 0  | 0      | 0       | 0   | 0           | NA |
| sum   |    |    |      |       |    |    |        |         |     |             |    |

The sequence identity and orientation of segmental duplications that flanking the chr17q21.31 inversion were examined (see Supplementary Table 1 for whole data set). We found that H2 when compared to chimpanzee or H1, shows higher sequence identity and ~95 kbp of duplications in the direct orientation on either side of the inversion. Q/SNAME=Query/Subject name along with coordinates within assembly, length of alignment (Length), percent sequence identity (Per\_sim), genetic distance Kimura 2-parameter (K2p) model and orientation of alignment.

Supplemental Table 4: Evolutionary age estimation

| Type                | Sequence Divergence (K2p) |          |       |            |          |
|---------------------|---------------------------|----------|-------|------------|----------|
|                     | Length                    | Mismatch | %Div  | K (kimura) | SE       |
| H1 tandem Dup       | 195264                    | 353      | 0.180 | 0.001810   | 0.000096 |
| H2-specific Dup     | 73733                     | 183      | 0.242 | 0.002486   | 0.000184 |
| PTR Dup             | 98145                     | 1243     | 1.22  | 0.013088   | 0.000501 |
| H1 vs. H2 Inversion |                           |          |       | 0.004170   | 0.000090 |

  

|               | Evolutionary Age T=K/2R |                   |
|---------------|-------------------------|-------------------|
|               | PTR outgroup            | PPY outgroup      |
| H1 tandem Dup | 0.995± 0.053 mya        | 0.745 ± 0.040 mya |
| H2 Dup        | 1.367 ± 0.101 mya       | 1.024 ± 0.076 mya |
| PTR Dup       | 7.198 ± 0.275 mya       | 5.388 ± 0.206 mya |
| H1 vs. H2     | 2.293 ± 0.049 mya       | 1.717 ± 0.037 mya |

We first estimated the average sequence divergence distance based on a 219 kb multiple alignment of Human H1, H2, chimpanzee and orangutan. Human (H1, H2) vs. chimpanzee distance  $K = (0.010930 + 0.010890) / 2 = 0.010910$  (Table 2). Using chimpanzee as outgroup (6 mya), we plug in the equation  $R = K / 2T$  and calculated the average substitution rate =  $0.010910 / 12 \text{ mya} = 9.0916 \times 10^{-4}$  per site/mya. If we use orangutan as outgroup, we estimated the average substitution rate =  $0.034005 / 28 \text{ mya} = 1.214 \times 10^{-3}$  per site/mya. Using above substitution rate (R) and sequence divergence (Kimura-2 parameter, K), we then estimated the evolutionary age ( $T = K / 2R$ ) of each event.

Supplementary Table 5: Chimpanzee sequence divergence in chr17q1.31 region

| <b>Library</b> | <b>Chimpanzee</b> | <b>Geographic Location</b> | <b>Total Number of Traces</b> | <b>Analyzed Traces</b> | <b>Aligned Positions</b> | <b>Differences</b> | <b>Heterozygosity</b> |
|----------------|-------------------|----------------------------|-------------------------------|------------------------|--------------------------|--------------------|-----------------------|
| S221           | Yvonne            | Western                    | 504,000                       | 172                    | 81,216                   | 92                 | 0.11%                 |
| S222           | Karlien           | Western                    | 504,576                       | 174                    | 83,203                   | 140                | 0.17%                 |
| S216           | Mauku             | Central                    | 507,840                       | 106                    | 41,042                   | 137                | 0.33%                 |
| S217           | Noemie            | Central                    | 592,577                       | 170                    | 83,201                   | 318                | 0.38%                 |
| S215           | Clara             | Central                    | 495,456                       | 90                     | 41,163                   | 69                 | 0.17%                 |
| Fosmids*       | Clint             |                            | 1,493,254                     | 106                    | 48,408                   | 144                | 0.30%                 |

In order to assess the extent of chimpanzee nucleotide diversity of this region, we analyzed diversity of this region from five other chimpanzees by aligning paired-end sequences to the unique portion of the Clint 17q21.31 BAC assembly (See Methods). \*For Clint, only ESPs with at least one end mapping with <100% identity were considered. Thus, the true divergence between the two chromosomes found in Clint will be less than the calculated value of 0.3%.
